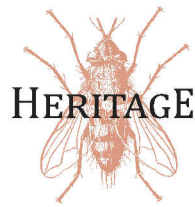

# Charles Valentine Riley: Taxonomic Contributions of an Eminent Agricultural Entomologist

Alfred G. Wheeler, Jr., E. Richard Hoebeke, and Edward H. Smith

The contributions of C. V. Riley (1843-1895) (Fig. 1) were crucial to agricultural entomology's 19th-century rise to world preeminence (Sorensen 1995). As an economic entomologist, he was said to be "far and away the most eminent the world has ever seen" (Fletcher 1895). By all measures, he is among the most influential and prominent entomologists of any era. His work has been termed "epoch making" (Howard 1894), and in the words of Evans (1968), "few more remarkable figures have ever crossed the stage of entomology."<sup>1</sup>

As State Entomologist of Missouri (1868-1877), Riley produced annual reports "packed with facts new to science" (Packard 1895). His nine Missouri reports surpassed those of renowned state entomologists Asa Fitch in New York and B. D. Walsh<sup>2</sup> in Illinois, owing largely to a more attractive

and readable format, detailed accounts and illustrations of insects and their life stages, and an engaging, unaffected literary style (Fletcher 1895, Howard 1930, Meiners 1943, Evans 1968). As head of the U.S. Entomological Commission (the other members were A. S. Packard and Cyrus Thomas), he gained national prominence for his work to combat ravages from the Rocky Mountain locust [*Melanoplus spretus* (Walsh)] in western states (Howard 1930, Lockwood 2004, Sorensen et al. 2008).<sup>3</sup> International acclaim followed the success of two major pest-suppression projects: biological control of the cottony cushion scale (*Icerya purchasi* Maskell) (Fig. 2) in California citrus orchards (Riley 1893a, Douth 1958, Caltagirone and Douth 1989)<sup>4</sup> and campaign against the grape phylloxera [*Daktulosphaira vitifoliae* (Fitch)] in France (Smith and Smith 1996, Sorensen

et al. 2008). Riley also served as chief of the U.S. Department of Agriculture's Division of Entomology and advocated passage of the Hatch Act of 1888, which provided for the establishment of agricultural experiment stations in the land-grant colleges (Riley 1891, Howard 1930, Smith 1989, Smith and Smith 1996, Mitter 1999, Sorensen et al. 2008). Moreover, Riley's (and B. D. Walsh's) acceptance of Darwinian principles allowed entomologists to assume a leading role in the new field of evolutionary biology (Sorensen 1995, Sheppard 2004).<sup>5</sup>

<sup>1</sup>Sorensen (1995, ch. 8) ranked Riley first among a core group of 108 entomological authors who were publishing around 1870 and explained how he ranked entomologists cited in the *Record of American Entomology* (1868-1873). Sorensen's chapter also includes a discussion of authors' geographic residence at time of birth, parents' occupation, educational background, sources of entomological training, associations with prominent teachers, fields of study, and other categories that permit the American entomological community of 1870 to be characterized. Henshaw (1889) listed 1,554 titles in a bibliography of the "more important writings" of C. V. Riley (through 1888). In *Atlantic Monthly*, a writer of a notice of Henshaw's work wondered "how much Dr. Riley's less important writings would swell the total" (Anonymous 1890).

<sup>2</sup>Walsh (1808-1869) served as Riley's mentor, helping shape his protégé's entomological thinking. The success of Riley's Missouri reports benefited from his association with Walsh (Howard 1930, Meiners 1943, Smith and Smith 1996, Sheppard 2004, McWilliams 2008). As State Entomologist of Illinois, Walsh had produced only one annual report before his death in 1869 as the result of a railroad accident.

<sup>3</sup>Lockwood's (2004) book *Locust: the Devastating Rise and Mysterious Disappearance of the Insect that Shaped the American Frontier* is an engaging account of the Rocky Mountain locust. The Entomological Commission's work later encompassed other pests, e.g. the chinch bug, Hessian fly, lepidopterans on cotton, and insects of forest and shade trees (Meiners 1943).

<sup>4</sup>Lintner (1890) and Howard (1930, p. 502), among other authors, stated why most of the credit for successful control of the cottony cushion scale should have gone to Riley rather than Albert Koebele, who was dispatched to Australia to look for natural enemies of the scale.

<sup>5</sup>In reviewing the entomological contributions of Charles Darwin, Riley (1882a) commented that of all the branches of natural science, entomology had benefited the most from Darwin's work. Riley later acknowledged that it was due to Darwin's influence that naturalists were placing less emphasis on the "dry bones" of their science and instead realized that if modern science were to solve far-reaching problems, it needed to draw more direct inspiration "from the vital manifestations of nature" (Riley 1884). Kritsky (1981) provided an index to the many references to insects in Darwin's writings.

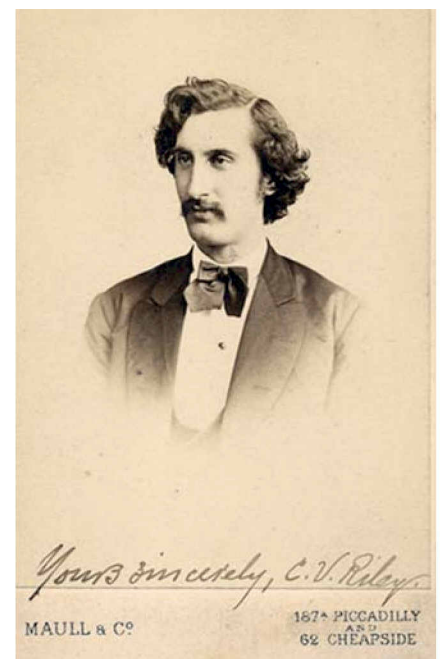

Fig. 1. Portrait of C. V. Riley, age 27 or 28 (1871), by Maull & Co., London. Courtesy of Gary L. Miller and M. Alma Solis, Systematic Entomology Laboratory, ARS, USDA, Beltsville, MD.

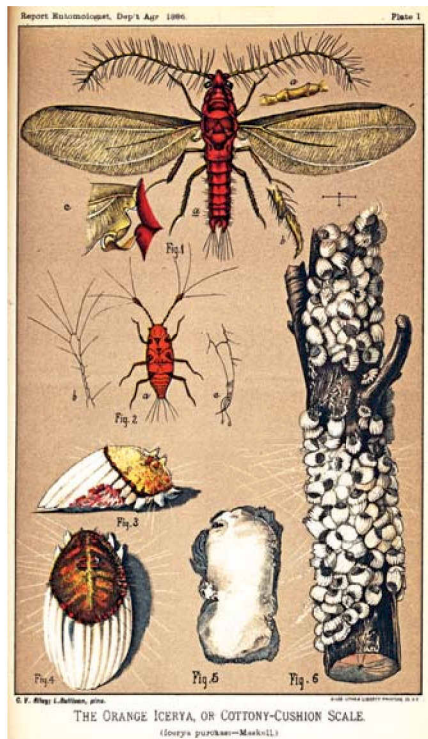

Fig. 2. Principal life stages of the cottony cushion scale, *Icerya purchasi* Maskell, illustrated by Lillie Sullivan under the supervision of C. V. Riley (or L. O. Howard). Reproduced from Report of the Commissioner of Agriculture, 1886. Government Printing Office, Washington, DC.

Biographers, understandably, have emphasized Riley's work in applied entomology and devoted scant attention to his taxonomic interests. Ever the pragmatist<sup>6</sup> (Riley 1891, p. 207; Smith 1989), he sometimes is said to have contributed little to systematics, having described "but few" new species (Goode 1896). We agree that Riley was not a "systematist as such" and not a "species man" (Packard 1895). He disfavored pedantry and the tendency of taxonomy to overshadow biological research (Riley 1884). His philosophy was not to see how many new species he could describe (Riley 1886):

"It is more creditable to any author to publish some full and complete account of any one insect, whose characters and habits have hitherto been unknown, or a synopsis or monograph of some genus or family, than to cast to the world a whole number of hasty descriptions of species; for while descriptive work thoroughly and faithfully done is of the highest order and most creditable, it is a fact that many entomological writers have busied themselves with descriptive work which has had little other result than to confuse and perplex all subsequent honest and serious workers in the same field."

Yet we also can side with Essig's (1931) assessment: that Riley "did a considerable amount of systematic work." His writings included comments on species concepts (e.g., Riley 1883a) and dealt with an important element of systematics—"discovery and characterization of the world's species and the range of their life stages" (Mitter 1999). Riley (1888) commented that the dearth of classificatory works and monographs hindered entomological progress in North America, realizing that taxonomic work, including accurate identifications, is crucial to biological control (e.g., Rosen 1986) and other aspects of entomology. Riley's taxonomic interests complemented his more applied work, and a proficiency with parasitic Hymenoptera might have given him a better appreciation of the potential importance of parasitoids in alleviating damage from agricultural pests. Riley (1871a, pp. 157-158) described *Trichogramma minutum* Riley, a parasitoid wasp widely used in the biological control of pest insects and the subject of numerous experimental studies (Smith 1996). It is appropriate that he be credited with establishing at the Smithsonian Institution a tradition of taxonomic research on parasitic Hymenoptera (Knutson 1991), one that has continued into the 21st century. Riley also was a principal founder and the first president of the Entomological Society of Washington, which publishes a quarterly journal (*Proc. Entomol. Soc. Wash.*) emphasizing taxonomic contributions (Riley 1886, Gurney 1976, Spilman 1984).<sup>7</sup>

Here, we examine the taxonomic interests and work of C. V. Riley,<sup>8</sup> using *taxonomy* in a broad sense to include systematics and what sometimes is termed *biosystematics*. We look at his estimate of the number of insect species on Earth; his role on a committee

charged with developing a code to stabilize nomenclature for North American insects; his building of a large personal collection of insects, which eventually was donated to the Smithsonian Institution to ensure the prominence of a National Insect Collection; his investigations of insects characterized by complex life histories; and his descriptions of new taxa. We list the arthropod genera and species he described as new, indicating whether the names currently are valid, and list the taxa named in his honor (patronyms). We conclude by evaluating Riley's overall contributions to systematic entomology.

### Pondering Global Insect Richness

Until the 1980s, relatively few workers had become interested in assessing the full extent of biotic diversity on our planet (Gaston 1991, Stork 1993). Erwin (1991) and Gaston (1991) remarked that naturalists at least as early as the 1830s had begun to ask how many insect species are found on Earth, referring to Westwood's (1833) article. Interest in the number of insect species actually predated the work of Linnaeus (Berenbaum 2009). Renowned British naturalist John Ray (1691) estimated insect species at 10,000 before revising his estimate to 20,000.<sup>9</sup> Early estimates also included 600,000 (Kirby and Spence 1815) and 400,000 species (Westwood 1833). Most early efforts at estimating the number of extant insect species were based on the number of Linnaean species, subsequent annual rates of species descriptions, and thoughts on the numbers of new species that remained to be described (Erwin 1991). Examples of the use of taxonomists' products to estimate world insect richness are papers by Metcalf (1940) and Sabrosky (1952). In the years leading up to Erwin's

<sup>6</sup>Riley (1891) made clear his views on the practical aspects of entomology: "Where it [anatomic work] is given for the purpose of describing species and synopsis or monographing higher groups, without reference to agriculture, I am firmly of the belief that it diverts one from economic work..." Science, he felt, was best served "when the pure and the applied go hand-in-hand—when theory and practice are wedded" (Riley 1884).

<sup>7</sup>In its first 10 years, the *Proceedings of the Entomological Society of Washington* was characterized by a dearth of papers on systematics (Howard 1895), but soon more taxonomic contributions were published in the journal, some of substantial length (Howard 1909).

<sup>8</sup>Riley's work in taxonomy and other entomological endeavors, in Missouri and later in Washington, DC, benefited from that of assistants and field agents, including L. O. Howard, O. Lugger, Mary Murtfeldt, T. Pergande, E. A. Schwarz, and F. M. Webster (Howard 1930, Meiners 1943, Russell 1980, Adler et al. 2004). At the time, it was customary for scientists to assume credit for their assistants' work (Howard 1930, 1933; Evans 1968, Mallis 1980). Riley, however, was so talented and driven to excellence that he likely would be held in as high esteem today had he not received help from assistants. In all his work, Riley was the "directing mind," and in the opinion of Goode (1896), he demonstrated in his first year when he had no assistance that "he was able to have done the work unaided." Entomologists who did not work directly with Riley often held more favorable opinions of him; they were less likely to have to deal with his "many moods and whims" and his sometimes "dictatorial" and "temperamental" nature (Osborn 1937, pp. 152-156). Canadian entomologist James Fletcher, for example, found Riley to be a "kind, patient and true" friend (Fletcher 1895).

<sup>9</sup>Ray's revised figure of 20,000 species, at the time "reckoned a magnificent idea" (Westwood 1833, p. 118), was cited on p. 23 of Ray's (1714) edition (the sixth, corrected, published posthumously) but probably appeared in earlier revisions of his book. Gill (1897) suggested that Ray believed the number of living insects—described and undescribed—would not be much more than 20,000.

(1982) widely cited estimate of 30 million insect species, a figure that for the first time was based on testable hypotheses, most estimates of Earth's biota ranged from 1.5 to 3–5 million species (May 1986). Aware of an earlier estimate of 10 million insect species, biologists such as Gossard (1909), Brues (1946), Sabrosky (1952), and Erwin (1982) referred to that higher figure, but without attribution. Bates (1950) credited C. T. Brues as the source of the 10-million estimate for numbers of insect species, but the "hardy soul" (Metcalf 1940) who should be credited with that estimate is C. V. Riley, nearly 60 years earlier (Berenbaum 2009).

Riley's (1892a) estimate of 10 million insect species was widely noticed at the time (e.g., Anonymous 1892, Ashmead 1893, Gill 1897, Kenyon 1897).<sup>10</sup> Even though Riley's (1892a) figure was merely a guess, rather than based on data from studies of insects in natural communities, it was based on several assumptions not considered by most other 19<sup>th</sup>-century estimators of insect diversity, including a correction for synonymy.

Riley (1892a) began by reviewing previous guesses of the number of insects, including John Day's of 250,000 in 1853, David Sharp's of a half million to a million in 1883, and those of Sharp and Lord Walsingham of nearly two million in 1889. For his own estimate, Riley began by estimating the number of species already described on the basis of lists and "estimates of specialists in the different orders." He then took the average number of insect species described annually since 1864 (6500 spp.), the year when the *Zoological Record* began publication, and deducted 8% to allow for synonymy. Even an estimate of 2,000,000 seemed far too low, because most species had been described from temperate regions; the "vast numbers" of species in the tropics largely remained to be characterized and described. He also noted that other areas of the planet

had never been explored, and even in the best-collected regions, the majority of micro-Diptera and micro-Hymenoptera had not yet been named. Therefore, it seemed reasonable to assume that not one fifth of the insect fauna had been described. "To say that there are 10,000,000 species of insects in the world, would be...a moderate estimate" (Riley 1892a).

Similarly, more recent attempts to estimate the number of insect species in the world have relied on compiling the numbers of described species and querying taxonomic specialists regarding the number of species they suppose remain to be described in the different orders (e.g., Gaston 1991, Nielsen and Mound 1999). Earlier, L. O. Howard, at a meeting of the Entomological Society of Washington, broached the subject of how many insect species inhabit Earth and received estimates from taxonomic specialists in attendance; based on their estimates, he suggested that the total number of insect species might exceed 4,000,000 (Howard 1931). The other main approach for estimating insect richness involves extrapolations from samples (Gaston 1991, Colwell and Coddington 1994), typically from the tropics, to arrive at global estimates of insect species in other regions based on various assumptions involving host-plant specialization, vertical stratification, and other parameters (e.g., Erwin 1982, 1988; Ødegaard 2000; Stork and Grimbacher 2006; Dyer et al. 2007). Debate continues as to whether the number of extant insect species is about 5 million or less, or is 30 million or more (Adis 1990, Berenbaum 2009).<sup>11</sup>

Riley's involvement in estimating global insect diversity, though not based on field data that yield testable hypotheses, is important from a historical perspective and should be mentioned when early attempts to arrive at the number of insect species that exist on Earth are reviewed. He might have been the first to realize that the number of described species was inflated owing to synonymy, although his 8% correction underestimated actual rates of synonymy (e.g., Gaston and Mound 1993).

### Seeking Stability in Insect Nomenclature

Systematists generally agree that stability in scientific nomenclature is desirable (Usinger 1956). Rules governing zoological nomenclature in Great Britain—the British Association (or Strickland) Code—was drawn up in 1842 and republished in 1843

in France, Italy, and the United States. Though not international in scope, it led to substantial progress toward a uniform system (Mayr et al. 1953).

North American entomologists of the 19<sup>th</sup> century, in the absence of international rules for zoological nomenclature, were not bound by the British Code. Canadian and U.S. entomologists, however, paid relatively little attention to nomenclatural matters (Edwards 1873)<sup>12</sup> until Scudder's (1872) publication of radical and sweeping changes he intended to use in a forthcoming treatment of North American butterflies. Scudder's resurrection of obscure generic and specific names, based on strict adherence to priority rather than prevailing usage, elicited an outcry from insect taxonomists in North America. Wholesale name changes of insects are undesirable because they can lead to confusion and discourage further study (Edwards 1873).

Entomologists at the 1872 Dubuque, Iowa, meeting of the American Association for the Advancement of Science (AAAS)<sup>13</sup> unanimously expressed concern over Scudder's nomenclatural changes for American butterflies. Riley moved that a committee be appointed to draft a set of nomenclatural rules pertaining to insects in the hope that Scudder might be dissuaded from introducing inappropriate names in a larger work on butterflies. Other committee members were J. G. Morris and A. S. Packard from the United States and C. J. S. Bethune and W. Saunders from Canada (Anonymous 1872). Although some taxonomists objected to establishing nomenclatural rules for insects that would deviate from those set for other animal groups, Edwards (1873) defended the right of entomologists to separate themselves from other naturalists because of the increasing popularity of entomology compared to mammalogy, ornithology, and other natural sciences. Botany, he noted, already had adopted a separate code. Before the next AAAS meeting (Portland, Maine, in 1873), Riley solicited opinions on nomenclature from the membership (Bethune 1873). At the Portland meeting, Riley requested that the committee to formulate entomological nomenclature be dismissed because certain members were absent. In the end, a new committee was appointed, with W. H. Edwards, J. L. LeConte, and Scudder joining previous members Bethune and Riley, who served as chairman (Uhler 1873). At the Buffalo, New York, meeting in 1876, the Committee on Nomenclature

<sup>10</sup>Howard (1931) recalled that "competent biologists said they did not believe that Professor Riley realized what a million meant." Such skepticism, however, was not expressed by the four writers we cite: Anonymous (1892), Ashmead (1893), Gill (1897), and Kenyon (1897).

<sup>11</sup>Erwin (2004) suggested that the total number of insect species might be as high as 80,000,000.

<sup>12</sup>Walsh and Riley (1869), however, were exceptions, having written an article on scientific nomenclature in which they discussed the law of priority.

<sup>13</sup>Before a U.S. entomological society was formed, many entomologists attended annual meetings of the AAAS. At the Dubuque meeting, entomologists discussed the formation of an entomological subsection of AAAS, which later was known as the Entomological Club (Smith 1989).

(with A. R. Grote having joined LeConte, Riley, Saunders, and Scudder) unveiled a set of 11 rules. The committee unanimously endorsed certain rules but had divided opinion on “questions of priority raised by Scudder’s revisions” (Sorensen 1995). The Entomological Club of AAAS voted unanimously to accept the rules (Anonymous 1876). Saunders (1876) was confident that the adoption of rules would help stabilize entomological nomenclature.

Riley thus played a prominent role in North American efforts to achieve greater stability of zoological names. In actuality, the debate on nomenclatural matters within AAAS probably had little effect on taxonomic practices, but it demonstrated a maturing of entomology in North America (Sorensen 1995).<sup>14</sup>

During the period when entomological nomenclature was being debated at AAAS meetings, Riley played the role of “abjicator” regarding the correct name of the grape phylloxera (Sorensen et al. 2008). He first endorsed the use of Fitch’s *vitifoliae* (originally described in *Pemphigus*), a name that had priority, but soon decided that *Phylloxera vastatrix* Planchon was correct, according to prevailing usage (Davidson and Nougaret 1921, pp. 26–27; Sorensen et al. 2008, pp. 142–143).<sup>15</sup> Other examples of Riley’s familiarity with and interest in

insect nomenclature include comments on the names of certain parasitic wasps (Riley 1880a) and the validity of one of Hübner’s lepidopteran names (Riley 1885a), as well as the need, owing to instability of generic names, to attach names of describers (authorities) to insect species to avoid any confusion concerning the taxa intended (Riley 1876, p. 85).

In addition, Walsh and Riley (1869) explained the basics of scientific nomenclature in their journal, *American Entomologist*. Responding to an inquiry about the appropriate scientific names of certain beetles, they noted that “it should never be forgotten that scientific nomenclature is a means and not an end.” They expressed their disdain for strict application of the “Law of Priority,” which can result in an earlier description of a species [by author A] taking precedence over a later, often more complete, description [by author B]. “And yet, in the majority of such cases...[author] A is in his grave, and perhaps it would have been a positive benefit to science if he had never been born. So that the practical result is, that, for the sake of appeasing the indignant ghost of some obscure and long-forgotten naturalist of the last century, all the naturalists of the present day are to be inconvenienced, and a great deal of valuable time is to be expended in studying out mere scientific phrases, which time might be employed to much better advantage in studying out new scientific facts.”

### Collecting Insects and Endowing a National Collection

Riley was born in London, but when he was only three years old, he and a younger brother began to live with a great-aunt in Walton-on-Thames, a “semiagricultural district” outside London (Smith and Smith 1996). The young boy, a product of the Victorian Era’s naturalist tradition (Sorensen 1995, Smith and Smith 1996, Lockwood 2004), began collecting and making pencil sketches of insects<sup>16</sup> (Anonymous 1895, McLachlan 1895, Howard 1930). A mostly unfamiliar Nearctic insect fauna awaited when he emigrated to the United States in 1860. In the agricultural area of Kankakee County, Illinois, where he worked on a farm, and in Chicago where he moved in 1863, he continued to collect and observe insects. Even when he joined the Union army in 1864, he was able to collect insects during six months of guard duty during the Civil War (with the 134th Regiment of Illinois)

(Meiners 1943, Smith and Smith 1996, Lockwood 2004). After he began to write for *The Prairie Farmer* (1863), he invited subscribers to that farm journal to send insects for identification. The specimens submitted, along with those he obtained through exchanges with local entomologists, provided a reference collection for his work in applied entomology (Smith and Smith 1996).

One of Riley’s responsibilities when he became State Entomologist of Missouri in 1868 was to provide an insect collection for the State Board of Agriculture, to be used in the instructional program at the University of Missouri once an agricultural college at that institution was founded. In an agreement with Riley, the Board was to be located in the same city as the university, but the Board remained in St. Louis, whereas the College of Agriculture was established at the university in Columbia. Controversy that developed over Riley’s obligation to provide a collection was resolved when a university committee ruled that he did not have to provide two collections, but merely had to give the College access to the State Board collection in St. Louis. The matter settled, Riley, in 1874, donated a type collection to the Agricultural College in Columbia (Smith and Smith 1996).

Riley’s personal collection eventually provided the basis for a national collection. Work by taxonomic entomologists of the U.S. Department of Agriculture (USDA) and the Smithsonian Institution has long been so closely associated that the two units have been regarded as one: Entomology at the National Museum. Riley even served simultaneously as head of USDA entomology and curator at the Museum (Sabrosky 1964).

In 1854, Townend Glover became the first U.S. (Federal) entomologist, having joined the Bureau of Agriculture, then in the U.S. Patent Office before Congress authorized the Department of Agriculture in 1862. As an artist, Glover was not much interested in systematic entomology and described no new species (Sorensen 1995).<sup>17</sup> In 1858, the relatively few insect specimens that had accumulated were transferred to the Smithsonian Institution, but during the 1860s, specimens, including types, were distributed for study to specialists in various insect groups. Specimens, however, could be reclaimed by the Museum at any time (Kellogg 1946). The Department of Agriculture was designated in 1874 (or a few years earlier; Sabrosky 1964) as the repository for specimens that came to the Museum (Kel-

<sup>14</sup>A detailed account of the debate over entomological nomenclature in 19th-century North America, placed within the context of views toward an evolutionary classification of insects, is given by Sorensen (1995). International rules were not forthcoming until publication in 1905 of the *Règles internationales de la Nomenclature zoologique*, an outcome of the Fifth International Congress of Zoology at Berlin in 1901 (Usinger 1956, ICZN 1999). Some taxonomists, however, continued to follow their own rules when they disagreed with those prescribed in the *Règles* (Blackwelder 1967). The first edition of the *International Code of Zoological Nomenclature* was published in 1961, and the Code now is in a fourth edition (ICZN 1999).

<sup>15</sup>The name for the grape phylloxera approved by the Entomological Society of America is *Daktulosphaira vitifoliae* (Fitch) ([http://www.entsoc.org/pubs/Common\\_Names/index.htm](http://www.entsoc.org/pubs/Common_Names/index.htm)), but the correct name for this pest continues to be debated (Sorensen et al. 2008).

<sup>16</sup>Riley’s early interest in insects apparently was inspired by the lepidopterist W. C. Hewitson, a resident of the neighboring village (Oatlands), who maintained an extensive insect collection (Meiners 1943, Mallis 1980). An example of one of his lepidopteran sketches, made at age 13, was reproduced by Smith and Smith (1996, p. 229).

<sup>17</sup>Townend Glover, having trained as an artist in England, had little interest in specimens and apparently left no collections (Howard 1930, Sorensen 1995). After he illustrated an insect, he apparently had little appreciation for it as a museum specimen (Wilkinson 1969). Glover was proud of having never described a new species, but he inadvertently validated the name of a psyllid (Riley 1883b, p. 69 in footnote).

logg 1946). The National Museum came into existence in 1876, but an insect department was not organized until 1881, the year Riley returned as Chief USDA Entomologist.<sup>18</sup> At the time, insect holdings in the national collection were minimal; the estimate of 1,000 specimens for all orders (Dyar 1902), however, did not include unaccessioned material (Sabrosky 1964). The USDA collection was transferred to the Smithsonian in 1881, the year in which Riley also placed his personal collection on deposit at the Museum so that it might form the nucleus of an appropriate national collection. He was appointed Honorary Curator of the collection (Sabrosky 1964, Sorensen 1995). The formal donation of his collection in 1885, after he was assured of increased support for entomology in the Museum, essentially marks the beginning of the Smithsonian insect collection.<sup>19</sup>

Riley's collection, regarded at the time as the largest general insect collection in the country, comprised some 150,000 specimens: 766 boxes containing 115,000 mounted specimens,<sup>20</sup> 2,850 vials of alcoholic material, and 3,000 slides of minute insects. About 20,000 species were represented (Goode 1889, Sabrosky 1964). According to Dyar (1902), the collection was rich (about 20%) in specimens of Lepidoptera, Riley having had a preference for the group. Goode's (1889) figures showed that the number of Riley's mounted and pinned specimens actually were dominated by Coleoptera, with the numbers for Hymenoptera also exceeding Lepidoptera. Riley's own comment regarding a specialty was that for years he had been accumulating material and notes on gall insects, Homoptera, and Diptera (Riley 1886). Riley emphasized the "biological side" of the national collection by preserving material that would best suit agricultural interests. His collection thus was rich in the larval and pupal stages of

insects, mainly species on which he had conducted biological studies (Goode 1889, 1896; Sabrosky 1964; Sorensen 1995). The donation of numerous immature stages of insects helped distinguish the holdings of the recently organized national collection from those of most other major insect collections. Taxonomic entomologists of the USDA continued to deposit immature stages in the National Museum (Sabrosky 1964).

Sabrosky (1964) paid tribute to the key role that Riley played in the development of a national collection of insects:

"...whatever Riley's personal faults, it may assuredly be stated that the Department of Entomology of the Museum and its collection owe a great deal to the foresight of this great USDA entomologist who insisted on *one* systematic collection, to be housed in the National Museum, who pressed constantly for salaried professional personnel and greater monetary support for the purchase of collections and the proper care of existing ones, who voluntarily and without pay acted as Curator of Insects for its first 14 years, who gave it to [*sic*; to it?] his own outstandingly valuable personal collection, and who, in the years when Museum support was scanty or non-existent, furthered the interests of the collection by detailing USDA specialists to curate, classify, and expand the collection while using it as a tool for their work for the Department of Agriculture."

That the U.S. National Collection of Insects (at the Smithsonian's National Museum of Natural History) ranks in world importance behind only the insect holdings of the Natural History Museum (London) and Muséum National d'Histoire Naturelle (Paris) (Knutson 1991) is due partly to Riley's (1890) vision of an insect collection at the National Museum:

"The ideal *cabinet* collection of a National Museum should represent, as completely as possible, the insect fauna of the country,

properly classified and determined. It can, necessarily, have little interest for the public at large and should be consecrated to the use of the specialist and to the advancement of the science of entomology. ...It should constitute a study collection to which workers are drawn for unpublished facts and for comparisons and determinations. It should be so well conserved and provided for as to induce describers of new species to add to it their types or authentic duplicates thereof. It will be many years ere such an ideal collection can be gotten together, and none now living may witness it, but the material now on hand forms a good foundation for it."

### Unraveling Complex Life Histories

Systematics can be considered the "point at which all biology comes together" (Mound and Gaston 1993). As the scientific study of living organisms and their relationships, the discipline is so rooted in biological investigation that the word *biosystematics* is in common use as a subdiscipline of systematics. Life-history studies, encompassing bionomic aspects such as host-plant relationships and characters of immature stages, have long been regarded as integral to insect systematics (Riley 1871b, Scudder 1878, Michener 1953). Systematists who routinely go into the field realize that fieldwork is important not only for acquiring specimens that otherwise would be unavailable for current and future research, but also for obtaining distributional and ecological data on the groups in which they specialize. Data accruing from field studies of herbivore-plant interactions are important in establishing species limits; discovering cryptic (sibling) species; understanding coevolution, contemporary (rapid) evolution, and mutualisms; and interpreting phylogenetic relationships of plants and insects.

Riley's biological work essentially knew no bounds: "My own studies are confined to no one Order, but rather embrace biologic studies in all Orders" (Riley 1886). He welcomed the challenge of studying insects with complex or unusual life histories; elucidating their bionomics required "the kind of biological sleuthing he so enjoyed" (Smith 1992). Though he was well versed with major entomological works such as those by Harris, Kirby and Spence, and Westwood, Riley (1873a, p. 44) considered Nature herself the best textbook. As a naturalist, he has been compared favorably with the exceptionally talented workers with whom he corresponded: Henry Walter Bates, Thomas

<sup>18</sup>Riley first became Chief of the USDA Division of Entomology in 1878, succeeding Townend Glover. When Riley appealed directly to Congress for increased funding for entomological programs, he incurred the wrath of Commissioner of Agriculture William LeDuc. Riley, after only nine months in office, was forced to resign in 1879, and John Henry Comstock was brought from Cornell University to serve as head of Entomology. With a change of administration in 1881 (following the death of James A. Garfield), Riley was reappointed to his former position (Howard 1930, Marcus 1985, Sorensen 1995). Hoping one day to become Assistant Secretary of Agriculture, Riley appealed to President-elect Grover Cleveland to appoint a friend, J. Sterling Morton, as Secretary; Riley hoped his long-time friend would enable him to become Assistant Secretary. When such a position was not forthcoming, Riley expressed his displeasure, which created political tension and led to Riley's resignation in May 1894 (Howard 1930, Meiners 1943).

<sup>19</sup>Riley (1885c) intended to donate his personal collection "whenever such donation is justified." John B. Smith's appointment as Assistant Curator in August 1885 was crucial to assuring Riley that the Smithsonian's insect holdings would receive appropriate care (Goode 1889, Kellogg 1946, Sabrosky 1964). In the years immediately preceding that appointment, doubt as to whether the insect collection would receive proper care had been expressed in the pages of *Science* (e.g., 4 [98]: 540, 1884; 5 [100]: 25, 1885; 5 [109]: 188, 1885).

<sup>20</sup>Riley's direct-mounting procedures included the pinning of aphids, a curious practice by modern standards but one not uncommon at the time. Pinned aphids often were remounted in balsam by Riley's assistant Theodore Pergande (Miller and Footitt 2009; G. L. Miller, personal communication).

Belt, Charles Darwin, Asa Gray, Fritz and Hermann Müller, and Alfred Russel Wallace (Pellmyr 2003). Though the design of some of his laboratory experiments might have been flawed (Lockwood 2004), his biological observations were characterized by great accuracy and meticulousness (Osborn 1937, Davis 1967). In any problem he tackled, he displayed a “wonderfully keen appreciation of the essential factors” involved (Osborn 1937). He also was relentless in attempting to resolve unanswered questions about an insect’s life cycle, such as oviposition and voltinism of the armyworm [*Pseudaletia unipuncta* (Haworth)] (Sheppard and Weinzierl 2002). Riley was able to move easily between the applied and basic aspects of his discipline, an aptitude that impressed Charles Darwin, who referred to Riley’s findings in several of his books (Kritsky 1995). In a letter to Riley in May of 1877, Darwin complimented him on his Missouri reports, noting that he managed “to discuss points of general interest, besides those of practical importance” (Kritsky 1995, p. 94).

Riley’s name always will be linked with the grape phylloxera. This insect’s invasion of European vineyards threatened the wine industry in mid-19<sup>th</sup>-century France when that country was attempting to recover from the Franco-Prussian War and deal with a downturn in the cotton and silk industries (Smith 1992, Lockwood 2004). Resolution of the vineyard crisis featured “heroes, villains, mystery, and political intrigue” (Weber 2006). The main hero was Riley,<sup>21</sup> who determined that the pest plaguing France was a native North American species that had been accidentally introduced into Europe (Riley 1872, pp. 55-71). The phylloxeran’s life cycle, one of the most complex in the Insecta (Sorensen et al. 2008), involves cryptic root-galling forms (gallicoles) as well as leaf-galling forms (radicoles) and multiple stages, both asexual and sexual (Riley 1872). Although leaf galls are uncommon on the European grape (*Vitis vinifera*), the roots

are particularly susceptible to phylloxeran damage (Riley 1872, 1874, pp. 30-64; Smith 1992; Granett et al. 2001). After rejecting chemical control and shipping a Nearctic predatory mite<sup>22</sup> that became established but proved unsuccessful in suppressing phylloxeran populations, he decided that plant resistance was critical to solving the problem of an immigrant pest whose root feeding led to the decline and death of grape vines. American species of *Vitis*, having co-evolved with or had long-term evolutionary contact with the phylloxeran, might show tolerance to its feeding (Riley 1872, p. 66; Wapshere and Helm 1987; Smith 2005). The eventual solution to the problem—grafting *V. vinifera* scions onto resistant rootstock of *V. labrusca* from the American Midwest<sup>23</sup> (Smith 2005)—is a story that has been detailed by Ordish (1972), Smith (1992), Campbell (2005), and Sorensen et al. (2008). Riley (1886) remarked that he was gratified that hundreds of square miles of once-devastated vineyards had been “reconstituted.” For helping save the French wine industry, he was honored by the French government and the country’s viticulturists (Smith 1992, Sorensen et al. 2008).

The insights and instincts that characterized many of Riley’s entomological investigations were evident in his phylloxeran work, which demonstrated that he was one of the earliest workers to appreciate a “general understanding of the process of plant-insect coevolution” (Pellmyr 2003). Riley even predicted that the grape phylloxera would develop biotypes (“races”; Riley 1871a, p. 91; Smith 1992). About 100 years later, when isozyme analyses showed that infestations on ‘Concord’ and ‘Niagara’ grapes in the northeastern United States involved different biotypes (Williams and Shambaugh 1988, Smith 2005), Riley’s prediction of a ‘Concord’ biotype was fulfilled (Granett et al. 2001).

Of Riley’s many biological studies of insects, none had greater evolutionary sig-

nificance than those involving yucca moths as the exclusive pollinators of *Yucca* species. The interrelationship between yuccas and moths of the genera *Parategeticula* and *Tegeticula* (family Prodoxidae) is considered a classic example of coevolution—one involving a tight mutualism—and one of the first and most compelling examples of evolution by natural selection (Pellmyr 2003). The moths actively pollinate the flowers, with their larvae, in turn, restricted to developing on yucca seeds. Only four other examples are known of obligate seed-feeding pollinators and their host plants (Pellmyr et al. 2006). Riley’s studies of the yucca moth were important for extending investigations by entomologists beyond mimicry and polymorphism and served as additional examples of “a unique blend of theory and practice that by the 1870s characterized American entomology (Sorensen 1995).”

Reviews of yucca-yucca moth mutualisms (Baker 1986, Powell 1992, Pellmyr 2003) and an account of Riley’s yucca research (Sheppard and Oliver 2004) allow us to provide only an overview of his work. Riley’s observations contained “very few inaccuracies” (Pellmyr 2003), and the summary of his life-history studies of the yucca-yucca moth system (Riley 1892b) remained the definitive biological reference for about 70 years. Subsequent textbooks, however, often oversimplified yucca pollination. Biologists began to refer to *the* yucca moth as if it were the only pollinator known, even though Riley had described two yucca-pollinating species other than the principal pollinator, *T. yuccasella* (all three species originally were described in the genus *Pronuba* but now are placed in *Tegeticula*) (Baker 1986). Riley’s prediction that additional prodoxid species would be found as pollinators of southwestern yuccas eventually was realized (Powell 1992, Sheppard and Oliver 2004).

Not until the 1980s did the complexity of yucca pollination become fully appreciated (Powell 1992, Sheppard and Oliver 2004). Since Davis’s (1967) descriptions of new yucca moths, new pollinating species, as well as nonpollinators of yuccas, have been described (Pellmyr 1999; Pellmyr and Balcázar-Lara 2000; Pellmyr et al. 2006, 2008).<sup>24</sup>

Among other insects with complex or atypical life histories that Riley studied, we mention his interest in parasitism, specifically groups whose different instars exhibit different larval types. He had a particular interest in the Strepsiptera, an ectopara-

<sup>21</sup>A valuable collaborator was Professor J. E. Planchon of the School of Agriculture in Montpellier, France. Earlier, he had described the phylloxeran as *Phylloxera vastatrix*, now considered a synonym of *D. vitifoliae* by many taxonomists. For his role in helping save the French wine industry, Planchon was honored with a monument erected in Montpellier after his death (Smith 1992, Sorensen et al. 2008).

<sup>22</sup>The predatory mite (Acari: Acaridae) that Riley sent to France, “*Tyroglyphus phylloxerae*,” was a species he had described as new (Riley 1874, p. 81). The identity of this acarid mite now is uncertain (Gerson et al. 2003, p. 1; B. M. O’Connor, personal communication).

<sup>23</sup>Grafting was chosen over the planting of American vines because it allowed the use of traditional grape cultivars that French vintners preferred (Sorensen et al. 2008).

<sup>24</sup>Yucca-associated prodoxid moths not involved in pollination (*Prodoxus* spp.) are considered sister to the pollinating genera. Referred to as “bogus yucca moths” (e.g., Riley 1880b), species of *Prodoxus* often co-occur on yuccas with the pollinating species. Adults of nonpollinators, because they lack maxillary “tentacles” [palps], do not collect pollen; the larvae develop on flowering stalks, fruits, or leaf tissues rather than seeds (Davis 1967, Pellmyr et al. 2006).

sitic order in which hypermetamorphosis involves active first instars or triungulins (Riley 1893b). He obtained some of the first life-history data on certain hypermetamorphic species of the beetle families Meloidae and Rhipiphoridae (Scudder 1878, Riley 1893b, Clausen 1940). Riley's meloid studies enhanced an understanding of coleopteran phylogeny (Packard 1895). Howard (1882) credited Riley with being the first to substantiate alternation of generations in cynipid wasps (Riley 1873b).<sup>25</sup> Other insects that attracted his attention were periodical cicadas<sup>26</sup> (e.g., Riley 1885d) (Fig. 3); the ectoparasitic beaver beetle (*Platypyllus castoris* Ritsema) (e.g., Riley 1888), whose systematic position had long been problematic; the hop aphid<sup>27</sup> [*Phorodon humuli* (Schrank)], which switches seasonally between a summer (secondary) host and a winter (primary) host (Riley 1889) (Fig. 4); and the hackberry psyllids (*Pachypsylla* spp.) (Riley 1883b, 1885b), whose life histories might be the most complicated among North American gall-inducing Psyllidae (Yang and Mitter 1994). Riley's (1883b) conclusion that psyllids inducing galls on different parts of hackberry represent distinct species has been supported by electrophoretic data (Yang and Mitter 1994).

### Describing New Genera and Species

Riley was aware that colleagues who pursued the purely scientific aspects of entomology tended to denigrate those who emphasized the discipline's practical applications. Walsh and Riley (1868), for example, noted that the agricultural entomologist "may perhaps occupy a lower position in the scientific world than the ingenious artists, who are every day grinding up varieties into species, and flooding science with new genera and new families, as uncalled for and unnecessary as a fifth wheel on a coach." Even though Riley chided those taxonomists whose goals seemingly were to attach their

<sup>25</sup>Riley (1873b) referred to cynipid observations by H. F. Bassett of Waterbury, Connecticut. Bassett's (1873) paper appeared a few months before the one by Riley in which cynipids were mentioned only in passing in an article on butterflies. Howard (1882) suggested that both workers should be credited with establishing that cynipids exhibit alternation of generations.

<sup>26</sup>In his first Missouri report, Riley (1869, pp. 18-42) was the first to refer to geographic broods of periodical cicadas. His use of Roman numerals to designate broods has continued (Meiners 1943).

<sup>27</sup>The hop aphid provides an example of work done by one of Riley's assistants that he published under his own name. In the case of *Phorodon humuli*, studies were done "almost totally" by T. Pergande in central New York (Russell 1980).

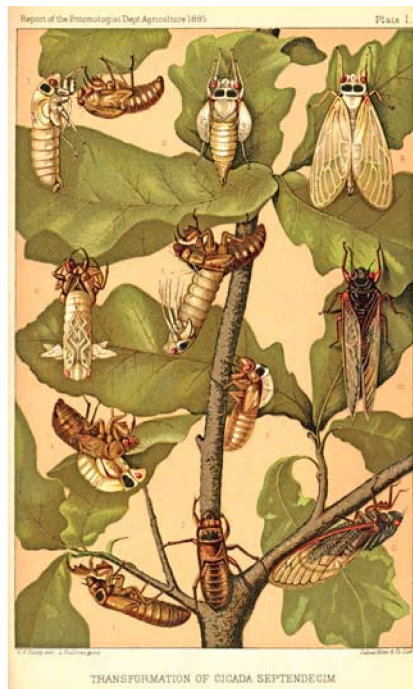

Fig. 3. Principal life stages of the periodical cicada, *Magicicada septendecim* (L.) (sensu Riley 1885d), illustrated by Lillie Sullivan under the supervision of C. V. Riley. Reproduced from Report of the Commissioner of Agriculture, 1885. Government Printing Office, Washington, DC.

names to as many new taxa as possible, he was not averse to describing new arthropod species, mainly those of economic importance, and, occasionally, describing new insect genera. Some taxonomists resented his describing new species in the Missouri reports rather than in technical publications (Meiners 1943).

The 19 genus-group names that Riley proposed, and their current status, are listed in Table 1. Thirteen of his new genera are considered valid.

In compiling a list of species described by Riley (Table 2), we referred to Henshaw's (1890) compilation of new names he proposed, including those coauthored with L. O. Howard and B. D. Walsh, and used *Zoological Record* to find names of species Riley described after Henshaw's cut-off date for literature. To determine the status of his North American species, we relied on *Nomina Insecta Nearctica* (Poole and Gentili 1996-1997), supplemented by information in more recent taxonomic catalogs and other works on selected groups, for example, Psyllidae (Yang and Mitter 1994, Yang et al. 2001). As is the case with any major catalog or database, *Nomina Insecta Nearctica* contains omissions, misspellings, and other errors (e.g., Pollock 1996), but we did not

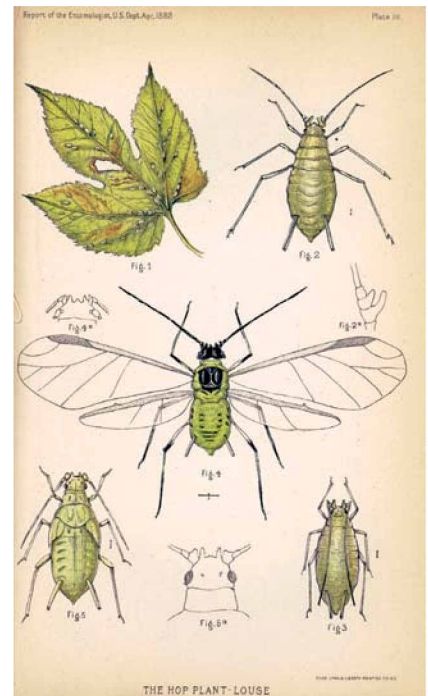

Fig. 4. Principal life stages of the hop aphid, *Phorodon humuli* (Schrank) (illustrator unknown). Reproduced from Report of the Commissioner of Agriculture, 1888. Government Printing Office, Washington, DC.

attempt to correct any such errors in Poole and Gentili's listing of Riley's names. We also might have overlooked some of Riley's new species or incorrectly determined the current status of certain names he proposed as new.

From 1867 to 1893, Riley described 203 new insect species, mostly from the Nearctic Region, in six orders (with Hemiptera encompassing homopterans), plus 12 species of mites and ticks. Still considered valid are 133 insect species, with the original combination valid for 57 species. Of the 66 names considered invalid, 48 are synonyms (synonymy rate = 23.6%), 6 are homonyms, and 12 are *nomina nuda* (or otherwise unavailable). Of his 12 non-insect names, 5 are valid. Twenty-one of his arthropod species (1 mite; 20 insects) bear official common names approved by the Entomological Society of America ([http://www.entsoc.org/pubs/Common\\_Names/index.htm](http://www.entsoc.org/pubs/Common_Names/index.htm); Table 3).

In addition to Riley's species-group names that are available under rules of the International Commission on Zoological Nomenclature, Riley assigned manuscript names for psyllids (Hodkinson 1988) and other insects he thought were new species, but never validated the names. Workers who

**Table 1. Genus-group names proposed by C.V. Riley.**

| Taxon                | Year | Order:Family                   | Current status                                                              |
|----------------------|------|--------------------------------|-----------------------------------------------------------------------------|
| <i>Blastophysa</i>   | 1884 | Hemiptera: Psyllidae           | Syn. of <i>Pachypsilla</i>                                                  |
| <i>Brachylivia</i>   | 1884 | Hemiptera: Aphalaridae         | <i>Nomen nudum</i>                                                          |
| <i>Caloptenobia</i>  | 1878 | Hymenoptera: Scelionidae       | Syn. of <i>Scelio</i>                                                       |
| <i>Carphoxera</i>    | 1891 | Lepidoptera: Geometridae       | Syn. of <i>Idaea</i>                                                        |
| <i>Ceropsylla</i>    | 1884 | Hemiptera: Triozidae           | Valid                                                                       |
| <i>Clydonopteron</i> | 1880 | Lepidoptera: Pyralidae         | Valid                                                                       |
| <i>Dendrotettix</i>  | 1893 | Orthoptera: Acrididae          | Valid                                                                       |
| <i>Didyctium</i>     | 1879 | Hymenoptera: Figitidae         | Valid                                                                       |
| <i>Hornia</i>        | 1877 | Coleoptera: Meloidae           | Valid                                                                       |
| <i>Melissopus</i>    | 1881 | Lepidoptera: Tortricidae       | Valid                                                                       |
| <i>Ophelosia</i>     | 1890 | Hymenoptera: Pteromalidae      | Valid                                                                       |
| <i>Pachypsilla</i>   | 1885 | Hemiptera: Psyllidae           | Valid                                                                       |
| <i>Paleacrita</i>    | 1876 | Lepidoptera: Geometridae       | Valid                                                                       |
| <i>Pentarthron</i>   | 1872 | Hymenoptera: Trichogrammatidae | MS name; = <i>Pentartrum sensu</i><br>Dalla Torre 1898 ( <i>pro-</i> thron) |
| <i>Podapion</i>      | 1883 | Coleoptera: Brentidae          | Valid                                                                       |
| <i>Prodoxus</i>      | 1880 | Lepidoptera: Prodoxidae        | Valid                                                                       |
| <i>Pronuba</i>       | 1872 | Lepidoptera: Prodoxidae        | Homonym; = <i>Tegeticula</i>                                                |
| <i>Proteoterus</i>   | 1881 | Lepidoptera: Tortricidae       | Valid                                                                       |
| <i>Rhinopsylla</i>   | 1885 | Hemiptera: Triozidae           | Valid                                                                       |

later described Riley's species sometimes used his manuscript names.

### Honoring Riley with Patronymic Names

Essig (1931) recorded two genera and 23 species named in Riley's honor, implying the list was incomplete. Our list (Table 4) includes the patronyms Essig (1931) provided and 47 additional names (7 genera, 40 species), but it probably does not represent a complete listing of all taxa named for Riley.

### Evaluating Riley's Taxonomic Work

Riley earns high marks for his studies in insect bionomics, many of which represented important contributions to systematics. His biological publications sometimes

included comments on the systematic position of insects such as the beaver beetle, or yielded information of phylogenetic significance, such as that relating to meloid beetles. Instead of restricting his discussion of social insects to ants, bees, wasps, and termites, Riley (1894) broadened his treatment to include tent caterpillars and webworms, as well as the social butterfly *Eucheira socialis* Westwood. He was a gifted entomologist and field observer who accepted the challenge of investigating species of biological complexity. His observations were thorough, his interpretations astute, and his predictions insightful. When others challenged his research findings, especially those involving yucca moths, he relied on "powers of

observation" and "clarity of reasoning" to rebut critics (Sheppard and Oliver 2004). McLachlan (1895) remarked that the "only one real *fiasco*" in Riley's career was the prediction (Riley 1876) that the Colorado potato beetle [*Leptinotarsa decemlineata* (Say)] might soon be carried to Europe. Recently, in contrast to McLachlan's remark, Riley's prediction was termed "prophetic" because the beetle was detected (but subsequently eradicated) in Germany in 1876 (Ebbels 2003).<sup>28</sup>

Riley's words were often prescient, as in the example of his conclusions regarding the phylogeny of yucca moths (Sheppard and Oliver 2004). Insect classification, he noted, often is based on the study of isolated groups, without an appreciation of the complex relationships that the study of a higher taxon on a worldwide basis can reveal (Riley 1882b). Moreover, his comments about how quickly native herbivores can acquire new characters and habits as they switch from wild to cultivated (presumably non-native) hosts (Riley 1886) presaged the recent interest in rapid evolution. He discouraged placing too much emphasis on

<sup>28</sup>Riley (1876) stated that in the summer of 1875 the Colorado potato beetle had been detected at the docks in Bremen in cargo arriving from New York. This event supported his contention that adults could be transported in commerce. McLachlan (1895) thought Riley was disappointed that the beetle did not become established in Europe as quickly as he had predicted; that is, as early as 1871 (Riley 1876, p. 76). The Colorado potato beetle became permanently established in Europe near Bordeaux in the early 1920s and reached Germany by the mid-1930s (Radcliffe 1982, Weber and Ferro 1994).

**Table 2. Species-group names of arthropods proposed by C. V. Riley, including those with B. D. Walsh (W & R) and L. O. Howard (R & H).**

| Order: Family                     | Original combination            | Year | Current status <sup>a</sup>                         |
|-----------------------------------|---------------------------------|------|-----------------------------------------------------|
| Prostigmata: Trombiculidae        | <i>Leptus americanus</i>        | 1873 | <i>Incertae sedis</i>                               |
|                                   | <i>Leptus irritans</i>          | 1873 | Syn. of <i>Eutrombicula alfreddugesi</i> (Oudemans) |
| Prostigmata: Eriophyidae          | <i>Acarus aceriscrumena</i>     | 1870 | In <i>Vasates</i>                                   |
| Prostigmata: Tetranychidae        | <i>Tetranychus 6-maculatus</i>  | 1890 | Emend.; = <i>Tetranychus sexmaculatus</i> Riley     |
| Parasitengona: Trombidiidae       | <i>Trombidium giganteum</i>     | 1878 | <i>Incertae sedis</i>                               |
|                                   | <i>Trombidium locustarum</i>    | 1878 | Valid                                               |
| Trombidiformes: Microtrombidiidae | <i>Trombidium muscarum</i>      | 1878 | In <i>Trichotrombium</i>                            |
| Trombidiformes: Hydrachnidae      | <i>Hydrachna belostomae</i>     | 1878 | <i>Incertae sedis</i>                               |
| Parasitiformes: Uropodidae        | <i>Uropoda americana</i>        | 1877 | <i>Incertae sedis</i>                               |
| Oribatida: Phthiracaridae         | <i>Hoplophora arctata</i>       | 1874 | In <i>Phthiracarus</i>                              |
| Astigmata: Acaridae               | <i>Tyroglyphus phylloxerae</i>  | 1874 | In <i>Acarus</i>                                    |
| Ixodida: Ixodidae                 | <i>Ixodes bovis</i>             | 1867 | Syn. of <i>Rhipicephalus annulatus</i> Say          |
| Orthoptera: Acrididae             | <i>Caloptenus atlantis</i>      | 1876 | Syn. of <i>Melanoplus sanguinipes</i> (F.)          |
|                                   | <i>Dendrotettix longipennis</i> | 1893 | Syn. of <i>Dendrotettix quercus</i> Packard         |
| Orthoptera: Gryllidae             | <i>Oecanthus latipennis</i>     | 1881 | Valid                                               |
|                                   | <i>Aleyrodes citri</i> R&H      | 1893 | Homonym; = <i>Dialeurodes citri</i> (Ashmead)       |
| Hemiptera: Aleyrodidae            | <i>Aleyrodes citrifolii</i> R&H | 1892 | Unavail.; = <i>Dialeurodes citri</i> (Ashmead)      |
|                                   | <i>Eriosoma ulmi</i>            | 1869 | Homonym; = <i>Eriosoma rileyi</i> (Thomas)          |
| Hemiptera: Aphididae              | <i>Lachnus platanicola</i>      | 1883 | Syn. of <i>Longistigma caryae</i> (Harris)          |
|                                   | <i>Pemphigus acerifolii</i>     | 1879 | Syn. of <i>Prociophilus tessellatus</i> (Fitch)     |
|                                   | <i>Pemphigus fraxinifolii</i>   | 1879 | In <i>Meliarhizophagus</i>                          |
|                                   | <i>Pemphigus populimonilis</i>  | 1879 | In <i>Thecabius</i>                                 |
|                                   |                                 |      |                                                     |

Table 2. (continued on next page)



Table 2. (continued)

| Order: Family              | Original combination                   | Year | Current status <sup>a</sup>                             |
|----------------------------|----------------------------------------|------|---------------------------------------------------------|
|                            | <i>Pemphigus populiramulorum</i>       | 1879 | Valid                                                   |
|                            | <i>Pemphigus populitransversus</i>     | 1879 | Valid                                                   |
|                            | <i>Pemphigus ulmifusus</i> W&R         | 1869 | In <i>Kaltenbachia</i>                                  |
|                            | <i>Schizoneura americana</i>           | 1879 | In <i>Eriosoma</i>                                      |
| Hemiptera: Calophyidae     | <i>Calophya nigripennis</i>            | 1884 | Valid                                                   |
| Hemiptera: Cicadellidae    | <i>Diedrocephala flaviceps</i> R&H     | 1880 | In <i>Xyphon</i>                                        |
| Hemiptera: Coccidae        | <i>Ceroplastes utilis</i> R&H          | 1892 | Unavail.; = <i>Ceroplastes utilis</i> Cockerell         |
|                            | <i>Lecanium acericola</i> W&R          | 1868 | In <i>Pulvinaria</i>                                    |
|                            | <i>Lecanium macluriae</i> W&R          | 1868 | <i>Incertae sedis</i>                                   |
| Hemiptera: Diaspididae     | <i>Chionaspis angustior</i> R&H        | 1893 | Unavail., <i>incertae sedis</i>                         |
|                            | <i>Chionaspis major</i> R&H            | 1893 | Unavail.; = <i>Rutherfordia major</i> (Cockerell)       |
|                            | <i>Chionaspis timidus</i> R&H          | 1893 | Unavail.; = <i>Pinnaspis dysoxylis</i> (Maskell)        |
|                            | <i>Mytilaspis pomicorticis</i>         | 1873 | Syn. of <i>Lepidosaphes ulmi</i> (L.)                   |
|                            | <i>Mytilaspis ulmicorticis</i>         | 1874 | Syn. of <i>Lepidosaphes ulmi</i> (L.)                   |
| Hemiptera: Kermesidae      | <i>Kermes galliformis</i>              | 1881 | In <i>Allokermes</i>                                    |
| Hemiptera: Lygaeidae       | <i>Nysius destructor</i>               | 1873 | Syn. of <i>Nysius raphanus</i> Howard                   |
| Hemiptera: Margarodidae    | <i>Icerya montserratensis</i> R&H      | 1890 | Valid                                                   |
|                            | <i>Icerya palmeri</i> R&H              | 1890 | Valid                                                   |
|                            | <i>Icerya rosae</i> R&H                | 1890 | In <i>Crypticerya</i>                                   |
| Hemiptera: Phylloxeridae   | <i>Phylloxera caryaeavellana</i>       | 1880 | Valid                                                   |
|                            | <i>Phylloxera caryaefallax</i>         | 1875 | Valid                                                   |
|                            | <i>Phylloxera caryaegummosa</i>        | 1875 | Valid                                                   |
|                            | <i>Phylloxera caryaescissa</i>         | 1880 | Valid                                                   |
|                            | <i>Phylloxera caryaeren</i>            | 1875 | Valid                                                   |
|                            | <i>Phylloxera rileyi</i>               | 1875 | Valid                                                   |
| Hemiptera: Psyllidae       | <i>Pachypsylla celtidisasterisca</i>   | 1890 | Valid                                                   |
|                            | <i>Pachypsylla celtidiscucurbita</i>   | 1890 | Valid                                                   |
|                            | <i>Pachypsylla celtidisgemma</i>       | 1885 | Valid                                                   |
|                            | <i>Pachypsylla celtidisglobulus</i>    | 1890 | Valid                                                   |
|                            | <i>Pachypsylla celtidispubescens</i>   | 1890 | Valid                                                   |
|                            | <i>Pachypsylla celtidisumbilicus</i>   | 1890 | Valid                                                   |
|                            | <i>Pachypsylla celtidisvesicula</i>    | 1884 | Valid                                                   |
|                            | <i>Psylla celtidisgrandis</i>          | 1876 | In <i>Pachypsylla</i>                                   |
|                            | <i>Psylla celtidismamma</i>            | 1876 | In <i>Pachypsylla</i>                                   |
| Hemiptera: Triozidae       | <i>Ceropsylla sideroxyli</i>           | 1884 | Valid                                                   |
|                            | <i>Rhinopsylla schwarzii</i>           | 1885 | Valid                                                   |
| Coleoptera: Brentidae      | <i>Podapion gallicola</i>              | 1883 | Valid                                                   |
| Coleoptera: Chrysomelidae  | <i>Bruchus fabae</i>                   | 1871 | Syn. of <i>Acanthoscelides obtectus</i> (Say)           |
|                            | <i>Physonota quinquepunctata</i> W&R   | 1869 | Syn. of <i>Physonota helianthi</i> (Randall)            |
| Coleoptera: Curculionidae  | <i>Analcis fragariae</i>               | 1871 | In <i>Tyloderma</i>                                     |
|                            | <i>Madarus vitis</i>                   | 1869 | Syn. of <i>Ampelolypter sesostris</i> (LeConte)         |
|                            | <i>Scolytus carya</i>                  | 1867 | Syn. of <i>Scolytus quadrispinosus</i> Say              |
| Coleoptera: Meloidae       | <i>Hornia minutipennis</i>             | 1877 | Valid                                                   |
| Diptera: Agromyzidae       | <i>Oscinis brassicae</i>               | 1885 | In <i>Liriomyza</i>                                     |
| Diptera: Anisopodidae      | <i>Mycetophila persica</i>             | 1867 | Syn. of <i>Mycetobia divergens</i> Walker               |
| Diptera: Anthomyiidae      | <i>Anthomyia calopteni</i>             | 1877 | Syn. of <i>Delia platura</i> (Meigen)                   |
|                            | <i>Anthomyia zeas</i>                  | 1869 | Syn. of <i>Delia platura</i> (Meigen)                   |
| Diptera: Asilidae          | <i>Asilis missouriensis</i>            | 1870 | Syn. of <i>Proctacanthus milbertii</i> Macquart         |
| Diptera: Cecidomyiidae     | <i>Cecidomyia cupressiananassa</i>     | 1870 | Unavail.; = <i>Taxodiomyia cupressiananassa</i> (O. S.) |
|                            | <i>Cecidomyia pyrivora</i>             | 1886 | In <i>Contarinia</i>                                    |
|                            | <i>Cecidomyia vitis coryloides</i> W&R | 1869 | Unavail.; = <i>Schizomyia vitiscoryloides</i> (Packard) |
|                            | <i>Cecidomyia vitis pomum</i> W&R      | 1869 | Unavail.; = <i>Schizomyia vitispomum</i> (Osten Sacken) |
|                            | <i>Cecidomyia vitis lituus</i> W&R     | 1870 | Unavail.; = <i>Schizomyia viticola</i> (Osten Sacken)   |
| Diptera: Sarcophagidae     | <i>Sarcophaga sarraceniae</i>          | 1874 | Valid                                                   |
| Diptera: Simuliidae        | <i>Simulium meridionale</i>            | 1887 | Valid                                                   |
|                            | <i>Simulium pecuarum</i>               | 1887 | In <i>Cnephia</i>                                       |
|                            | <i>Simulium piscidium</i>              | 1870 | Valid                                                   |
| Diptera: Tachinidae        | <i>Exorista cecropiae</i>              | 1870 | In <i>Winthemia</i>                                     |
|                            | <i>Exorista flavicauda</i>             | 1870 | Syn. of <i>Belvosia unifasciata</i> (Robineau-Desvoidy) |
|                            | <i>Lydella doryphorae</i>              | 1869 | In <i>Myiopharus</i>                                    |
|                            | <i>Tachina aletiae</i>                 | 1879 | In <i>Lespesia</i>                                      |
|                            | <i>Tachina anonyma</i>                 | 1872 | In <i>Lespesia</i>                                      |
|                            | <i>Tachina archippivora</i>            | 1871 | In <i>Lespesia</i>                                      |
| Lepidoptera: Blastobasidae | <i>Blastobasis iceryaeella</i>         | 1887 | In <i>Holcocera</i>                                     |
|                            | <i>Gelechia glandulella</i>            | 1871 | In <i>Blastobasis</i>                                   |
| Lepidoptera: Coleophoridae | <i>Coleophora malivorella</i>          | 1879 | Syn. of <i>Coleophora multipulvella</i> Chambers        |
| Lepidoptera: Gelechiidae   | <i>Gelechia gallaesolidaginis</i>      | 1869 | In <i>Gnorimoschema</i>                                 |
|                            | <i>Gelechia hallipalpis</i>            | 1891 | Syn. of <i>Trichotaphe juncidella</i> Clemens           |
| Lepidoptera: Geometridae   | <i>Aplodes flavilineata</i>            | 1870 | Syn. of <i>Chlorochlamys chloroleucaria</i> (Guenee)    |
|                            | <i>Aplodes rubivora</i>                | 1869 | Syn. of <i>Synchlora aerata</i> (F.)                    |

Table 2. (continued)

| Order: Family                    | Original combination                | Year                              | Current status <sup>a</sup>                         |                                               |
|----------------------------------|-------------------------------------|-----------------------------------|-----------------------------------------------------|-----------------------------------------------|
| Lepidoptera: Noctuidae           | <i>Carphoxera ptelearia</i>         | 1891                              | Syn. of <i>Idaea bonifata</i> (Hulst)               |                                               |
|                                  | <i>Acronycta populi</i>             | 1870                              | Syn. of <i>Acronicta lepusculiana</i> Guenee        |                                               |
|                                  | <i>Agrotis cochranis</i>            | 1867                              | Syn. of <i>Euxoa messoria</i> (Harris)              |                                               |
|                                  | <i>Agrotis morrisoniana</i>         | 1875                              | Syn. of <i>Agrotis gladiaria</i> Morrison           |                                               |
|                                  | <i>Agrotis scandens</i>             | 1869                              | In <i>Euxoa</i>                                     |                                               |
|                                  | <i>Amphipyra conspersa</i>          | 1871                              | Syn. of <i>Amphipyra pyramidoides</i> Guenee        |                                               |
|                                  | <i>Anomis texana</i>                | 1885                              | Valid                                               |                                               |
|                                  | <i>Laphygma fulvosa</i>             | 1876                              | Syn. of <i>Spodoptera frugiperda</i> (J.E. Smith)   |                                               |
|                                  | <i>Laphygma obscura</i>             | 1876                              | Syn. of <i>Spodoptera frugiperda</i> (J.E. Smith)   |                                               |
|                                  | <i>Nola sorghiella</i>              | 1882                              | Valid                                               |                                               |
|                                  | <i>Plusia brassicae</i>             | 1870                              | Syn. of <i>Trichoplusia ni</i> (Hubner)             |                                               |
|                                  | <i>Prodenia autumnalis</i>          | 1871                              | Syn. of <i>Spodoptera frugiperda</i> (J.E. Smith)   |                                               |
|                                  | <i>Xanthoptera ridingsii</i>        | 1874                              | In <i>Exyra</i>                                     |                                               |
|                                  | <i>Xylina cinerea</i>               | 1871                              | Syn. of <i>Lithophane antennata</i> (Walker)        |                                               |
|                                  | Lepidoptera: Notodontidae           | <i>Cerura multiscrypta</i>        | 1875                                                | Syn. of <i>Cerura scitiscrypta</i> Walker     |
| Lepidoptera: Prodoxidae          | <i>Prodoxus aenescens</i>           | 1881                              | Valid                                               |                                               |
|                                  | <i>Prodoxus cinereus</i>            | 1881                              | Valid                                               |                                               |
|                                  | <i>Prodoxus decipiens</i>           | 1880                              | Syn. of <i>Prodoxus quinquepunctella</i> (Chambers) |                                               |
|                                  | <i>Prodoxus intermedius</i>         | 1881                              | Syn. of <i>Tegeticula yuccasella</i> (Riley)        |                                               |
|                                  | <i>Prodoxus marginatus</i>          | 1881                              | Valid                                               |                                               |
|                                  | <i>Prodoxus pulverulentus</i>       | 1892                              | Valid                                               |                                               |
|                                  | <i>Prodoxus y-inversum</i>          | 1892                              | Valid                                               |                                               |
|                                  | <i>Prodoxus reticulatus</i>         | 1892                              | In <i>Greya</i>                                     |                                               |
|                                  | <i>Prodoxus coloradensis</i>        | 1892                              | Valid                                               |                                               |
|                                  | <i>Prodoxus sordidus</i>            | 1892                              | Valid                                               |                                               |
|                                  | <i>Pronuba synthetica</i>           | 1892                              | In <i>Tegeticula</i>                                |                                               |
|                                  | <i>Pronuba maculata</i>             | 1881                              | In <i>Tegeticula</i>                                |                                               |
|                                  | <i>Pronuba yuccasella</i>           | 1872                              | In <i>Tegeticula</i>                                |                                               |
|                                  | Lepidoptera: Pterophoridae          | <i>Pterophorus carduidactylus</i> | 1869                                                | In <i>Platyptilia</i>                         |
|                                  | Lepidoptera: Pyralidae              | <i>Acrobasis vaccinii</i>         | 1884                                                | Valid                                         |
|                                  |                                     | <i>Chilo oryzaeaeus</i>           | 1882                                                | Syn. of <i>Chilo plejadellus</i> Zinck        |
|                                  |                                     | <i>Clydonopteron tecomae</i>      | 1880                                                | Syn. of <i>Clydonopteron sacculana</i> (Bosc) |
| <i>Pempelia hammondi</i>         |                                     | 1872                              | In <i>Psorosina</i>                                 |                                               |
| <i>Phycita nebulella</i>         |                                     | 1872                              | Syn. of <i>Acrobasis indigenella</i> (Zeller)       |                                               |
| <i>Aegeria rubi</i>              |                                     | 1874                              | Syn. of <i>Pennisetia marginatum</i> (Harris)       |                                               |
| <i>Anchylopera fragariae</i> W&R |                                     | 1869                              | Syn. of <i>Ancylois comptana</i> (Froelich)         |                                               |
| <i>Conchylis erigeronana</i>     |                                     | 1881                              | In <i>Carolella</i>                                 |                                               |
| <i>Conchylis oenotherana</i>     |                                     | 1881                              | In <i>Phtheochroa</i>                               |                                               |
| <i>Cydia ninana</i>              |                                     | 1883                              | Valid                                               |                                               |
| Lepidoptera: Sessidae            | <i>Exartema ferrugineum</i>         | 1881                              | In <i>Olethreutes</i>                               |                                               |
|                                  | <i>Exartema monetiferanum</i>       | 1881                              | In <i>Olethreutes</i>                               |                                               |
|                                  | <i>Grapholitha gallae-saliciana</i> | 1881                              | In <i>Cydia</i>                                     |                                               |
|                                  | <i>Grapholitha olivaceana</i>       | 1881                              | In <i>Phaneta</i>                                   |                                               |
|                                  | <i>Grapholitha sebastianiae</i>     | 1892                              | Syn. of <i>Cydia deshaisiana</i> Lucas              |                                               |
|                                  | <i>Melissopus aurichalceana</i>     | 1881                              | Syn. of <i>Cydia latiferreanus</i> (Walsingham)     |                                               |
|                                  | <i>Paedisca celtisana</i>           | 1881                              | In <i>Epinotia</i>                                  |                                               |
|                                  | <i>Paedisca giganteana</i>          | 1881                              | In <i>Eucosma</i>                                   |                                               |
|                                  | <i>Penthina fullerea</i>            | 1870                              | Syn. of <i>Endothenia hebesana</i> (Walker)         |                                               |
|                                  | <i>Phoxopteris cornifolia</i>       | 1881                              | Syn. of <i>Ancylys muricana</i> (Walsingham)        |                                               |
|                                  | <i>Phoxopteris murtfeldtiana</i>    | 1881                              | Syn. of <i>Ancylys burgessiana</i> (Zeller)         |                                               |
|                                  | <i>Proteoteras aesculana</i>        | 1881                              | Valid                                               |                                               |
|                                  | <i>Proteoteras claypoleana</i>      | 1882                              | In <i>Zeiraphera</i>                                |                                               |
|                                  | <i>Semasia helianthana</i>          | 1881                              | In <i>Suleima</i>                                   |                                               |
|                                  | <i>Tortrix cinderella</i>           | 1872                              | Syn. of <i>Acleris minuta</i> (Robinson)            |                                               |
|                                  | Hymenoptera: Braconidae             | <i>Apanteles acronyctae</i>       | 1881                                                | Homonym; = <i>Cotesia acronyctae</i> (Riley)  |
|                                  |                                     | <i>Apanteles aletiae</i>          | 1881                                                | In <i>Parapanteles</i>                        |
|                                  |                                     | <i>Apanteles argynnidis</i>       | 1889                                                | In <i>Cotesia</i>                             |
|                                  |                                     | <i>Apanteles cacaoeciae</i>       | 1881                                                | In <i>Dolichogenidea</i>                      |
| <i>Apanteles cassianus</i>       |                                     | 1881                              | In <i>Glyptapanteles</i>                            |                                               |
| <i>Apanteles cyaniridis</i>      |                                     | 1889                              | In <i>Cotesia</i>                                   |                                               |
| <i>Apanteles edwardsii</i>       |                                     | 1889                              | Valid                                               |                                               |
| <i>Apanteles emarginatus</i>     |                                     | 1889                              | Homonym; = <i>Cotesia scitulus</i> (Riley)          |                                               |
| <i>Apanteles flaviconchae</i>    |                                     | 1881                              | In <i>Cotesia</i>                                   |                                               |
| <i>Apanteles flavicornis</i>     |                                     | 1889                              | In <i>Cotesia</i>                                   |                                               |
| <i>Apanteles hemileuca</i>       |                                     | 1881                              | In <i>Cotesia</i>                                   |                                               |
| <i>Apanteles hyphanthiae</i>     |                                     | 1887                              | In <i>Cotesia</i>                                   |                                               |
| <i>Apanteles junoniae</i>        |                                     | 1889                              | In <i>Cotesia</i>                                   |                                               |
| <i>Apanteles koebelei</i>        |                                     | 1889                              | In <i>Cotesia</i>                                   |                                               |

Table 2. (continued on next page)

Table 2. (continued)

| Order: Family                  | Original combination             | Year | Current status <sup>a</sup>                           |
|--------------------------------|----------------------------------|------|-------------------------------------------------------|
|                                | <i>Apanteles megathymi</i>       | 1881 | Valid                                                 |
|                                | <i>Apanteles paleacritae</i>     | 1881 | In <i>Protapanteles</i>                               |
|                                | <i>Apanteles pholisora</i>       | 1889 | In <i>Cotesia</i>                                     |
|                                | <i>Apanteles politus</i>         | 1881 | In <i>Glyptapanteles</i>                              |
|                                | <i>Apanteles rufocoxalis</i>     | 1881 | In <i>Cotesia</i>                                     |
|                                | <i>Apanteles scitulus</i>        | 1881 | In <i>Cotesia</i>                                     |
|                                | <i>Apanteles smerinthis</i>      | 1881 | In <i>Cotesia</i>                                     |
|                                | <i>Apanteles theclae</i>         | 1881 | In <i>Cotesia</i>                                     |
|                                | <i>Bracon charus</i>             | 1875 | In <i>Atanycolus</i>                                  |
|                                | <i>Exothecus prodoxi</i>         | 1880 | In <i>Heterospilus</i>                                |
|                                | <i>Meteorus hyphanthiae</i>      | 1887 | Valid                                                 |
|                                | <i>Microgaster acronyctae</i>    | 1870 | In <i>Cotesia</i>                                     |
|                                | <i>Microgaster gelechia</i>      | 1869 | Valid                                                 |
|                                | <i>Microgaster limenitidis</i>   | 1871 | In <i>Cotesia</i>                                     |
|                                | <i>Microgaster pieridivora</i>   | 1882 | Syn. of <i>Cotesia glomeratus</i> (L.)                |
|                                | <i>Microplitis ceratoniae</i>    | 1881 | Valid                                                 |
|                                | <i>Microplitis gortynae</i>      | 1881 | Valid                                                 |
|                                | <i>Perilitus indagator</i>       | 1872 | In <i>Meteorus</i>                                    |
|                                | <i>Sigalphus rufus</i>           | 1871 | In <i>Nealiolus</i>                                   |
|                                | <i>Spathius trifasciatus</i>     | 1873 | Valid                                                 |
| Hymenoptera: Cephidae          | <i>Cephus occidentalis</i> R&M   | 1891 | Syn. of <i>Cephus cinctus</i> Norton                  |
| Hymenoptera: Chalcididae       | <i>Chalcis maria</i>             | 1870 | In <i>Conura</i>                                      |
| Hymenoptera: Cynipidae         | <i>Cynips quercusfloccicola</i>  | 1890 | <i>Incertae sedis</i>                                 |
|                                | <i>Cynips quercusglandulus</i>   | 1877 | <i>Incertae sedis</i>                                 |
|                                | <i>Cynips quercusmellaria</i>    | 1880 | <i>Incertae sedis</i>                                 |
|                                | <i>Cynips quercusprunus</i> W&R  | 1869 | In <i>Amphibolips</i>                                 |
|                                | <i>Dryophanta vesiculoides</i>   | 1895 | Unavail.; = <i>Dryophanta</i> of authors              |
| Hymenoptera: Eucoilidae        | <i>Didyctium zigzag</i>          | 1879 | In <i>Trybliographa</i>                               |
| Hymenoptera: Eulophidae        | <i>Cirrospilus esurus</i>        | 1879 | In <i>Aprostocetus</i>                                |
|                                | <i>Cirrospilus flavicinctus</i>  | 1883 | Valid                                                 |
|                                | <i>Pleurotropis phyllotretae</i> | 1885 | In <i>Pediobius</i>                                   |
|                                | <i>Tetrastichus productus</i>    | 1885 | Valid                                                 |
| Hymenoptera: Eurytomidae       | <i>Eurytoma bolteri</i>          | 1869 | Valid                                                 |
|                                | <i>Isosoma grandis</i>           | 1884 | In <i>Tetramesa</i>                                   |
|                                | <i>Isosoma tritici</i>           | 1882 | Homonym; = <i>Tetramesa grandis</i> (Riley)           |
| Hymenoptera: Ichneumonidae     | <i>Exochilum acronyctae</i>      | 1890 | Unavail.; = <i>Therion fuscipennis</i> (Norton)       |
|                                | <i>Hemiteles alae fasciatus</i>  | 1890 | Unavail.; = <i>Chirotica confederatae</i> (Ashmead)   |
|                                | <i>Hemiteles cressoni</i>        | 1869 | In <i>Mastrus</i>                                     |
|                                | <i>Hemiteles thyridopteryx</i>   | 1869 | In <i>Chirotica</i>                                   |
|                                | <i>Ichneumon obsoletus</i>       | 1877 | Homonym; = <i>Cratichneumon brevipennis</i> (Cresson) |
|                                | <i>Limneria lophyri</i>          | 1877 | In <i>Olesicampe</i>                                  |
|                                | <i>Porizon conotracheli</i>      | 1871 | In <i>Tersilochus</i>                                 |
| Hymenoptera: Pteromalidae      | <i>Merisus subapterus</i>        | 1885 | In <i>Trichomalopsis</i>                              |
|                                | <i>Ophelosia crawfordi</i>       | 1890 | Valid                                                 |
| Hymenoptera: Scelionidae       | <i>Caloptenobia ovivora</i>      | 1878 | In <i>Scelio</i>                                      |
|                                | <i>Scelio calopteni</i>          | 1893 | Syn. of <i>Scelio opaca</i> (Provancher)              |
|                                | <i>Scelio caloptenorum</i>       | 1885 | Valid                                                 |
|                                | <i>Scelio ernstii</i>            | 1885 | Valid                                                 |
|                                | <i>Scelio luggeri</i>            | 1893 | Syn. of <i>Scelio opaca</i> (Provancher)              |
|                                | <i>Telenomus arzamae</i>         | 1893 | Valid                                                 |
|                                | <i>Telenomus bifidus</i>         | 1887 | Valid                                                 |
|                                | <i>Telenomus clisiocampae</i>    | 1893 | Valid                                                 |
| Hymenoptera: Torymidae         | <i>Stictonotus isosomatis</i>    | 1882 | In <i>Eridontomerus</i>                               |
| Hymenoptera: Trichogrammatidae | <i>Trichogramma minuta</i>       | 1871 | Valid                                                 |
|                                | <i>Trichogramma pretiosa</i>     | 1879 | Valid                                                 |

<sup>a</sup>Abbreviations: Emend.= Emendation; Syn.= synonym; Unavail.= unavailable.

biological control, noting that the success of the vedalia beetle would be difficult to repeat (Riley 1893a). He also acknowledged that the use of insecticides could destroy natural enemies of pest insects (McWilliams 2008). He was first to refute the myth that black flies (Simuliidae) are able to kill fish by “ensnaring them in silken death webs” (Adler et al. 2004). Those who criticized his findings often were rebuked in print,

sometimes harshly (e.g., Sheppard and Oliver 2004). Those reprimanded by Riley might have been less upset about being the target of his barbs than in realizing that he “was usually correct in his arguments” (Davis 1967).

As expected, the availability of molecular and other modern research tools has necessitated reinterpretation of some of Riley’s work or otherwise advanced our biological

understanding of topics he studied, such as speciation in periodical cicadas (Cooley et al. 2001) and phylogeny of the pollinating yucca moths (Pellmyr et al. 2008). His observations sometimes were inaccurate. An example is stating that stridulation in adult passalid beetles involves the wing covers or elytra, when mainly the hind wings are used, the elytra playing only a supporting role (Costa 2006). Moreover, the bee- and

**Table 3. Species described by C. V. Riley having ESA-approved common names.**

| Common name               | Scientific name                           | ORDER       | Family            |
|---------------------------|-------------------------------------------|-------------|-------------------|
| appleleaf skeletonizer    | <i>Psorosina hammondi</i> (Riley)         | Lepidoptera | Pyralidae         |
| artichoke plume moth      | <i>Platyptilia carduidactylua</i> (Riley) | Lepidoptera | Pterophoridae     |
| cranberry fruitworm       | <i>Acrobasis vaccini</i> Riley            | Lepidoptera | Pyralidae         |
| minute egg parasite       | <i>Trichogramma minuta</i> Riley          | Hymenoptera | Trichogrammatidae |
| pear midge                | <i>Contarinia pyrivora</i> (Riley)        | Diptera     | Cecidomyiidae     |
| pine gall weevil          | <i>Podapion gallicola</i> Riley           | Coleoptera  | Brentidae         |
| pistol casebearer         | <i>Coleophora malivorella</i> Riley       | Lepidoptera | Coleophoridae     |
| poplar petiole gall aphid | <i>Pemphigus populitransversus</i> Riley  | Hemiptera   | Aphididae         |
| poplar twig gall aphid    | <i>Pemphigus populiramulorum</i> Riley    | Hemiptera   | Aphididae         |
| serpentine leafminer      | <i>Liriomyza brassicae</i> (Riley)        | Diptera     | Agromyzidae       |
| sixspotted mite           | <i>Eotetranychus sexmaculatus</i> (Riley) | Prostigmata | Tetranychidae     |
| sorghum webworm           | <i>Nola sorghiella</i> Riley              | Lepidoptera | Noctuidae         |
| southern buffalo gnat     | <i>Cnephia pecuarum</i> (Riley)           | Diptera     | Simuliidae        |
| strawberry crown borer    | <i>Tyloderma fragariae</i> (Riley)        | Coleoptera  | Curculionidae     |
| sunflower bud moth        | <i>Suilema helianthana</i> (Riley)        | Lepidoptera | Tortricidae       |
| turkey gnat               | <i>Simulium meridionale</i> Riley         | Diptera     | Simuliidae        |
| wheat strawworm           | <i>Tetramesa grandis</i> (Riley)          | Hymenoptera | Eurytomidae       |
| white cutworm             | <i>Euxoa scandens</i> (Riley)             | Lepidoptera | Noctuidae         |
| woolly elm aphid          | <i>Eriosoma americanum</i> (Riley)        | Hemiptera   | Aphididae         |
| yellowheaded leafhopper   | <i>Xyphon flaviceps</i> (Riley)           | Hemiptera   | Cicadellidae      |
| yucca moth                | <i>Tegeticula yuccasella</i> (Riley)      | Lepidoptera | Prodoxidae        |

wasp-mimicking robber flies (Asilidae) he considered “aggressive mimics” are thought more likely to represent Batesian mimics (Alcock 1999).

In addition to bionomics, Riley became involved in some of the more classical aspects of taxonomy, such as nomenclature. Occasionally, he made ill-advised decisions regarding the usage of scientific names. Because he regarded strict adherence to the laws of priority as an extreme view, he stubbornly persisted in using certain names that had been synonymized. Additionally, even though he realized his generic name *Pro-nuba* in the lepidopteran family Prodoxidae was preoccupied, and thus a homonym, he continued to use the name (Davis 1967).

Like Fitch, Lintner, Walsh and certain other 19th-century applied entomologists, Riley had diverse interests that included the description of new species. He did not, however, produce generic revisions in a strict sense. With the North American insect fauna only beginning to be described, revisionary studies were less necessary than they are today and were not customary in Riley’s time. In describing the new psyllid genus *Pachypsylla*, he did provide a key (“dichotomic table”) allowing separation of the three known species: his new species, one he described previously (subsequently synonymized), and one described by Osten-Sacken (Riley 1885b). Riley and Howard (1890) gave “synoptical” keys to newly hatched larvae (crawlers) and adult females of the species of the scale insect genus *Icerya*. That he appreciated the importance of catalogs and

synopses is indicated by his compilation of the principal works on European and North American insect taxonomy (the paper was motivated by inquiries about references for identifying American insects). In listing relevant taxonomic works, he criticized some of the descriptive and synoptic papers by younger authors as being “most insufficient and unsatisfactory” (Riley 1888).

Riley’s descriptions of new species often were illustrated, the drawings tending to reveal an emphasis on biology and immature stages. Although it was not yet routine for North American taxonomists to illustrate the adult habitus of species being described or to provide illustrations of diagnostic characters, Riley did include such illustrations (e.g., Riley 1873a, pp. 150-151; Riley and Howard 1890). He sometimes described and illustrated male genitalia (e.g., Riley 1892c). In realizing the value of referring to host plants when labeling specimens of phytophagous insects (Riley 1873a, pp. 43),<sup>29</sup> he was ahead of many of his North American contemporaries (and some 20<sup>th</sup>-century workers).

As a describer of new taxa, Riley cannot be accused of nomenclatural nihilism (Dubois 2008) or the “mihi itch” (Evenhuis 2008)—that is, the unwarranted description of new species by authors seeking recognition and apparent scientific “immortality.”

<sup>29</sup>Riley (1892a) advocated a system of indicating food plants on specimen labels, using numbers identical to those in a field notebook. This practice, however, is undesirable. Too often the notebooks are lost or else are preserved apart from the insect collections in which the specimens are housed.

His taxonomic philosophy called for evaluating morphological characters of a range of specimens—appreciating what now is termed intraspecific variation—rather than adopting a typological approach of “making species out of every little variation” (Riley 1871b, 1883a). His taxonomic work was punctuated neither by the carelessness of the British entomologist Francis Walker (e.g., Papavero and Ibáñez-Bernal 2001, Wilson and Turner 2007) nor generally considered suspect, as was that of the American coleopterist Thomas Casey (Leng, 1925, Hatch 1926). Consistent with practice typical of the time, Riley did not designate or label type material for the species he described. Types of species were not addressed in the International Rules (Règles Internationales) until they were recommended in 1913 (Mayr et al. 1953, p. 236).

Descriptions of new species can be considered equivalent to the generation of testable hypotheses in other areas of biology (Gaston and Mound 1993). One means of evaluating a taxonomist’s value to his contemporaries or to later generations is to look at the percentage of species that remain valid. A taxonomic hypothesis is falsified when a proposed name is shown to apply to the same biological entity (Gaston and Mound 1993). Species still considered valid are not necessarily so—their status might never have been evaluated—and even valid descriptions often are inadequate for identification purposes. Furthermore, taxonomists producing a low rate of synonymy might not have included keys to species or

**Table 4. Insects named in recognition of C. V. Riley (patronyms), with genus-group and species-group names arranged by year of publication (descending).**

| Original combination                    | Year | Order       | Family          | Status <sup>a</sup>                                       |
|-----------------------------------------|------|-------------|-----------------|-----------------------------------------------------------|
| <b>GENUS-GROUP</b>                      |      |             |                 |                                                           |
| <i>Rileyia</i> Ashmead                  | 1888 | Hymenoptera | Eurytomidae     | Valid                                                     |
| <i>Rileyia</i> Howard                   | 1888 | Hymenoptera | Encyrtidae      | Homonym; = <i>Chrysoplatycerus</i>                        |
| <i>Rileyia</i> Brauer & Bergenstamm     | 1893 | Diptera     | Tachinidae      | Homonym; = <i>Leschenaultia</i>                           |
| <i>Rileyomyia</i> Townsend              | 1893 | Diptera     | Tachinidae      | New name for <i>Rileyia</i> B&B; = <i>Lescehnaultia</i>   |
| <i>Rileyonymus</i> Dietz                | 1896 | Coleoptera  | Curculionidae   | Valid                                                     |
| <i>Macrorileyia</i> Ashmead             | 1900 | Hymenoptera | Eurytomidae     | Valid                                                     |
| <i>Rileyella</i> Townsend               | 1909 | Diptera     | Tachinidae      | Syn. of <i>Lespesia</i>                                   |
| <i>Rileyia</i> Melichar                 | 1906 | Hemiptera   | Issidae         | Homonym; = <i>Misodema</i>                                |
| <i>Rileyia</i> Olivier                  | 1911 | Coleoptera  | Lampyridae      | Homonym; = <i>Lucidota</i>                                |
| <b>SPECIES-GROUP</b>                    |      |             |                 |                                                           |
| <i>Tortrix rileyana</i> Grote           | 1868 | Lepidoptera | Tortricidae     | In <i>Archips</i>                                         |
| <i>Trogus rileyi</i> Cresson            | 1868 | Hymenoptera | Ichneumonidae   | In <i>Conocalama</i>                                      |
| <i>Aleiodes rileyi</i> Cresson          | 1869 | Hymenoptera | Braconidae      | In <i>Rogas</i>                                           |
| <i>Aleiodes rileyi</i> Cresson          | 1869 | Hymenoptera | Braconidae      | In <i>Rogas</i>                                           |
| <i>Depressaria rileyella</i> Chambers   | 1872 | Lepidoptera | Gelechiidae     | In <i>Gelechia</i>                                        |
| <i>Agrotis rileyana</i> Morrison        | 1874 | Lepidoptera | Noctuidae       | In <i>Onychagrotis</i>                                    |
| <i>Heteropacha rileyana</i> Harvey      | 1874 | Lepidoptera | Lasiocampidae   | Valid                                                     |
| <i>Epicauta rileyi</i> Horn             | 1874 | Coleoptera  | Meloidae        | Valid                                                     |
| <i>Lithocolletis rileyella</i> Chambers | 1875 | Lepidoptera | Gracillariidae  | In <i>Phyllonorycter</i>                                  |
| <i>Bucculatrix rileyi</i> Frey & Boll   | 1876 | Lepidoptera | Bucculatricidae | Syn. of <i>Bucculatrix ambrosiaefoliella</i> Chambers     |
| <i>Eriosoma rileyi</i> Thomas           | 1877 | Hemiptera   | Aphididae       | Replacement name for <i>Eriosoma ulmi</i> Riley           |
| <i>Selandria rileyi</i> Cresson         | 1880 | Hymenoptera | Tenthredinidae  | In <i>Periclista</i>                                      |
| <i>Lophyrus rileyi</i> Cresson          | 1880 | Hymenoptera | Diprionidae     | Syn. of <i>Neodiprion abbotti</i> (Leach)                 |
| <i>Lyda rileyi</i> Cresson              | 1880 | Hymenoptera | Pamphiliidae    | In <i>Pamphilius</i>                                      |
| <i>Selandria rileyi</i> Cresson         | 1880 | Hymenoptera | Tenthredinidae  | In <i>Periclista</i>                                      |
| <i>Albuna rileyana</i> Edwards          | 1881 | Lepidoptera | Sesiidae        | In <i>Synanthedon</i>                                     |
| <i>Batrachedra rileyi</i> Walsingham    | 1882 | Lepidoptera | Cosmopterygidae | In <i>Pyroderces</i>                                      |
| <i>Thyridopteryx rileyi</i> Heylaerts   | 1884 | Lepidoptera | Psychidae       | Valid                                                     |
| <i>Neuroterus rileyi</i> Ashmead        | 1885 | Hymenoptera | Cynipidae       | Emend.; syn. of <i>Neuroterus quercusrileyi</i> (Bassett) |
| <i>Doliosyrphus rileyi</i> Williston    | 1887 | Diptera     | Syrphidae       | Syn. of <i>Eristalis scutellaris</i> (F.)                 |
| <i>Brachypalpus rileyi</i> Williston    | 1887 | Diptera     | Syrphidae       | Syn. of <i>Chalcosyrphus metallifera</i> (Bigot)          |
| <i>Ephestia rileyella</i> Ragonot       | 1887 | Lepidoptera | Pyralidae       | In <i>Sosipatra</i>                                       |
| <i>Inostemma rileyi</i> Ashmead         | 1887 | Hymenoptera | Platygastridae  | Valid                                                     |
| <i>Tetrastichus rileyi</i> Lindeman     | 1887 | Hymenoptera | Eulophidae      | Syn. of <i>Tetrastichus carinatus</i> Forbes              |
| <i>Fontaria rileyi</i> Bollman          | 1889 | Polydesmida | Xystodesmidae   | In <i>Cleptoria</i>                                       |
| <i>Telenomus rileyi</i> Howard          | 1889 | Hymenoptera | Scelionidae     | Valid                                                     |
| <i>Wesmaelia rileyi</i> Ashmead         | 1889 | Hymenoptera | Hybrizontidae   | In <i>Hybrizon</i>                                        |
| <i>Orgilus rileyi</i> Ashmead           | 1889 | Hymenoptera | Braconidae      | Syn. of <i>Crassomicrodus divisus</i> (Cresson)           |
| <i>Wesmaelia rileyi</i> Ashmead         | 1889 | Hymenoptera | Ichneumonidae   | In <i>Hybrizon</i>                                        |
| <i>Telenomus rileyi</i> Howard          | 1889 | Hymenoptera | Scelionidae     | Valid                                                     |
| <i>Masicera rileyi</i> Williston        | 1889 | Diptera     | Tachinidae      | In <i>Lespesia</i>                                        |
| <i>Leonia rileyi</i> Dugas              | 1889 | Coleoptera  | Meloidae        | Syn. of <i>Hornia mexicana</i> Dugas                      |
| <i>Hemiteles rileyi</i> Ashmead         | 1890 | Hymenoptera | Ichneumonidae   | Syn. of <i>Dichrogaster crassus</i> (Provancher)          |
| <i>Xylonomus rileyi</i> Ashmead         | 1890 | Hymenoptera | Ichneumonidae   | In <i>Xorides</i>                                         |
| <i>Morrisonia rileyana</i> Smith        | 1890 | Lepidoptera | Noctuidae       | Syn. of <i>Morrisonia mucens</i> (Hubner)                 |
| <i>Metopius rileyi</i> Marlatt          | 1891 | Hymenoptera | Ichneumonidae   | Valid                                                     |
| <i>Eleodes rileyi</i> Casey             | 1891 | Coleoptera  | Tenebrionidae   | Valid                                                     |
| <i>Telamona rileyi</i> Goding           | 1892 | Hemiptera   | Membracidae     | In <i>Telamonanthe</i>                                    |
| <i>Rheumatobates rileyi</i> Bergroth    | 1892 | Hemiptera   | Gerridae        | Valid                                                     |
| <i>Pemphredon rileyi</i> Fox            | 1892 | Hymenoptera | Sphecidae       | Valid                                                     |
| <i>Sinea rileyi</i> Montandon           | 1893 | Hemiptera   | Reduviidae      | Valid                                                     |
| <i>Mythicomyia rileyi</i> Coquillett    | 1893 | Diptera     | Bombyliidae     | Valid                                                     |
| <i>Icerya rileyi</i> Cockerell          | 1895 | Hemiptera   | Margarodidae    | Valid                                                     |
| <i>Andricus rileyi</i> Ashmead          | 1896 | Hymenoptera | Cynipidae       | In <i>Dryocosmus</i>                                      |
| <i>Margarodes rileyi</i> Giard          | 1897 | Hemiptera   | Margarodidae    | Valid                                                     |
| <i>Phlepsius rileyi</i> Baker           | 1898 | Hemiptera   | Cicadellidae    | In <i>Paraphlepsius</i>                                   |
| <i>Pterophorus rileyi</i> Fernald       | 1898 | Lepidoptera | Pterophoridae   | In <i>Oidaematophorus</i>                                 |
| <i>Pterophorus rileyi</i> Fernald       | 1898 | Lepidoptera | Pterophoridae   | In <i>Oidaematophorus</i>                                 |
| <i>Actenopoda rileyi</i> Ashmead        | 1902 | Hymenoptera | Pompilidae      | <i>Nomen nudum</i> in <i>Aporus</i> ; unavail.            |
| <i>Tinea rileyi</i> Dietz               | 1905 | Lepidoptera | Tineidae        | In <i>Nemapogon</i>                                       |
| <i>Oecanthus rileyi</i> Baker           | 1905 | Orthoptera  | Gryllidae       | Valid                                                     |
| <i>Apanteles rileyanus</i> Ashmead      | 1906 | Hymenoptera | Braconidae      | <i>Nomen nudum</i> in <i>Apanteles</i> ; unavail.         |
| <i>Rabdophaga rileyana</i> Felt         | 1909 | Diptera     | Cecidomyiidae   | Valid                                                     |
| <i>Cryptapanteles rileyanus</i> Viereck | 1910 | Hymenoptera | Braconidae      | Syn. of <i>Cotesia scitula</i> (Riley)                    |
| <i>Eulachnus rileyi</i> Williams        | 1911 | Hemiptera   | Aphididae       | Valid                                                     |
| <i>Argyria rileyella</i> Dyar           | 1914 | Lepidoptera | Pyralidae       | Syn. of <i>Argyria rufisignella</i> Zeller                |
| <i>Xyleborus rileyi</i> Hopkins         | 1915 | Coleoptera  | Scolytidae      | Syn. of <i>Xyleborus volvulus</i> (F.)                    |

**Table 4. (continued)**

| Original combination                | Year | Order       | Family           | Status <sup>a</sup>                             |
|-------------------------------------|------|-------------|------------------|-------------------------------------------------|
| <i>Aphycus rileyi</i> Timberlake    | 1916 | Hymenoptera | Encyrtidae       | In <i>Metaphycus</i>                            |
| <i>Sarcophaga rileyi</i> Aldrich    | 1916 | Diptera     | Sarcophagidae    | In <i>Fletcherimyia</i>                         |
| <i>Boopthora rileyana</i> Enderlein | 1922 | Diptera     | Simuliidae       | Syn. of <i>Simulium venustum</i> Say            |
| <i>Acinopterus rileyi</i> Lawson    | 1927 | Hemiptera   | Cicadellidae     | Valid                                           |
| <i>Mammifrontia rileyi</i> Benjamin | 1936 | Lepidoptera | Noctuidae        | Valid                                           |
| <i>Erebia rileyi</i> Dos Passos     | 1947 | Lepidoptera | Satyridae        | Syn. of <i>Erebia youngi</i> Holland            |
| <i>Lepidostoma rileyi</i> Denning   | 1948 | Trichoptera | Lepidostomatidae | Syn. of <i>Lepidostoma tibialis</i> (Carpenter) |
| <i>Barylypa rileyi</i> Dasch        | 1984 | Hymenoptera | Ichneumonidae    | Valid                                           |

<sup>a</sup>Abbreviations: Emend.= emendation; Syn.= synonym.

had substantial influence on the systematic community, such as encouraging others to pursue systematics (Hodges 1976, Gaston and Mound 1993). Comparing the rate of synonymy among taxonomic workers is complex, involving changes in species concepts (Gaston and Mound 1993, Raczkowski and Wenzel 2007), which can differ among taxonomic groups and workers, as well as other factors beyond the scope of our paper.

Just as Riley did not shy away from studying the biology of insects having complex life histories, he similarly accepted the challenge of describing new species in taxonomically difficult groups, such as acalyprate Diptera, Aphidoidea, Chalcidoidea, Curculionoidea, microlepidoptera, and Psylloidea. Some 115 years after Riley's death, probably only a small proportion of his invalid names remains to be discovered; his synonymy rate, therefore, seems unlikely to increase substantially. Rates of synonymy vary widely among insect taxonomists (Gaston and Mound 1993). Riley's rate of 23.6% (synonyms only) or 32.5% (including other professional errors such as homonyms and *nomina nuda*) compares favorably with a current 20% (or greater) level of synonymy in Thysanoptera and certain other groups of the Insecta and is substantially better than that in certain other groups (Gaston 1991, Gaston and Mound 1993, Gaston et al. 1995, Solow et al. 1995, May 2002). Low rates of synonymy—all three of Riley's black fly species are still valid (Adler et al. 2004)—do not necessarily reflect particular expertise in a group. In the case of Simuliidae, so few North American species in this diverse family had been described at the time (Adler et al. 2004) that other workers were unlikely to have previously named those species that Riley described. Until recently, most of Riley's species of the psylloid genus *Pachypsylla* were considered synonyms (Hodkinson 1888), but allozyme studies, life-history data, and evaluation of

gall morphology and host plants suggest that Riley's species are indeed distinct (Yang and Mitter 1994) and attest to his exceptional taxonomic instincts.

### Concluding Thoughts

We regard C. V. Riley's contributions to taxonomic entomology as substantial. If the term *biosystematics* had been in use in the last half of the 19th century, he probably would have been considered a gifted biosystematist. He should be considered one of North America's most prominent and influential entomologists, having won national and international acclaim in agricultural entomology. Mallis (1971), in his book *American Entomologists*, placed Riley's biographical sketch in the chapter on early federal entomologists. Mallis also could have justified placing him in the chapter on early state entomologists, or in the chapter on entomologists of diverse interests. Had Riley chosen to specialize in insect taxonomy, Mallis might have been able to place his biographical sketch in a chapter devoted to notable specialists in a particular taxonomic group. With Riley's familiarity with morphology and nomenclature, feel for characters useful in discriminating species, a taxonomic philosophy seemingly advanced for its time, knowledge of both the American and European literature in entomology, facility with French and German, and talent as an illustrator, he probably could have become a leading 19th-century taxonomist. But Riley chose to pursue his passion—conducting biological studies that would help farmers contend with their pest problems. His work in applied entomology resulted in outstanding examples of pest suppression at home and abroad and influenced the course

<sup>30</sup>Riley's successor as chief of the USDA Bureau of Entomology was his former assistant, L. O. Howard. McWilliams (2008) suggested that the later reliance on chemical insecticides to control pest insects and rise of the chemical pesticide industry was partly the result of Howard's downplaying of Riley's biological control work.

of insect pest management, including the use of biological control, well into the 20<sup>th</sup> century.<sup>30</sup>

Were Riley alive today, his inherent pragmatism and love of nature might have made the conservation of biodiversity, especially insects, a good philosophical fit. Biodiversity conservation involves practical as well as moral considerations (Samways 2009). We can only wonder how he might have addressed one of the challenges of modern society: melding insect conservation, an evolving subdiscipline of entomology, with our measures for suppressing pest insects.

### Acknowledgments

We are grateful to Peter Adler (Clemson University) and Quentin Wheeler (Arizona State University) for suggestions that improved an early draft of the manuscript, Gary Miller (USDA ARS, Beltsville, MD) for providing the portrait of C.V. Riley used in Fig. 1 and allowing us to cite information he provided as a personal communication, Barry O'Connor (University of Michigan) for allowing us to cite information he gave us as a personal communication, and Kent Loeffler (Cornell University) for help in preparing the figures for publication. 

### References Cited

- Adis, J. 1990. Thirty million arthropod species—too many or too few? *J. Trop. Ecol.* 6: 115-118.
- Adler, P. H., D. C. Currie, and D. M. Wood. 2004. The black flies (Simuliidae) of North America. Cornell University Press, Ithaca, NY.
- Alcock, J. 1999. Mimics, aggressive and otherwise, pp. 292-295. In Hoyt, E. and T. Schultz [Eds.]. *Insect lives: stories of mystery and romance from a hidden world*. John Wiley, New York.
- Anonymous. 1872. The American Association. *Can. Entomol.* 4: 181-184.
- Anonymous. 1876. Meetings of the Entomological Club of the American Association for the Advancement of Science. *Can. Entomol.* 8: 181-185.
- Anonymous. 1890. Books of the month: Science. *Atlantic Mon.* 66: 284-285.
- Anonymous. 1892. [Review of] *Directions for*

- collecting and preserving insects*. By C. V. Riley. (Washington: Government Printing Office, 1892). *Nature* 46: 416.
- Anonymous. 1895.** Prof. C. V. Riley, M. A., Ph.D. *Entomol. News* 6: 241-243.
- Ashmead, W. H. 1893.** A monograph of the North American Proctotrypidae. Government Printing Office, Washington, DC.
- Baker, H. G. 1986.** Yuccas and yucca moths—a historical commentary. *Ann. Missouri Bot. Gard.* 73: 556-564.
- Bassett, H. F. 1873.** On the habits of certain gall insects of the genus *Cynips*. *Can. Entomol.* 5: 91-94.
- Bates, M. 1950.** The nature of natural history. Charles Scribner's Sons, New York.
- Berenbaum, M. 2009.** Insect biodiversity—millions and millions, pp. 575-582. In Footitt, R. G. and P. H. Adler [Eds.]. *Insect biodiversity: science and society*. Wiley-Blackwell, Chichester, UK.
- Bethune, C. J. S. 1873.** Annual address of the president of the Entomological Society of Ontario, 1873. *Can. Entomol.* 5: 182-184.
- Blackwelder, R. E. 1967.** Taxonomy: a text and reference book. John Wiley, New York.
- Brues, C. T. 1946.** Insect dietary: an account of the food habits of insects. Harvard University Press, Cambridge, MA.
- Caltagirone, L. E. and R. L. Doutt. 1989.** The history of the vedalia beetle importation to California and its impact on the development of biological control. *Annu. Rev. Entomol.* 34: 1-16.
- Campbell, C. 2005.** The botanist and the vintner: how wine was saved for the world. Algonquin Books, Chapel Hill, NC.
- Clausen, C. P. 1940.** Entomophagous insects. McGraw-Hill, New York.
- Colwell, R. K. and J. A. Coddington. 1994.** Estimating terrestrial biodiversity through extrapolation. *Phil. Trans. R. Soc. Lond. B* 345: 101-118.
- Cooley, J. R., C. Simon, D. C. Marshall, K. Slon, and C. Ehrhardt. 2001.** Allochronic speciation, secondary contact, and reproductive character displacement in periodical cicadas (Hemiptera: *Magicicada* spp.): genetic, morphological, and behavioural evidence. *Mol. Ecol.* 10: 661-671.
- Costa, J. T. 2006.** The other insect societies. Harvard University Press, Cambridge, MA.
- Davidson, W. M. and R. L. Nougaret. 1921.** The grape phylloxera in California. U. S. Dep. Agric. Bull. 903.
- Davis, D. R. 1967.** A revision of the moths of the subfamily Prodoxinae (Lepidoptera: Incurvariidae). *Bull. U. S. Natl. Mus.* 255: 1-170. Smithsonian Institution, Washington, DC.
- Doutt, R. L. 1958.** Vice, virtue, and the vedalia. *Bull. Entomol. Soc. Am.* 4(4): 119-123.
- Dubois, A. 2008.** A partial but radical solution to the problem of nomenclatural taxonomic inflation and synonymy load. *Biol. J. Linn. Soc.* 93: 857-863.
- Dyar, H. G. 1902.** The collection of Lepidoptera in the National Collection. *Proc. Entomol. Soc. Wash.* 5: 61-72.
- Dyer, L. A., M. S. Singer, J. T. Lill, J. O. Stireman, G. L. Gentry, R. J. Marquis, R. E. Ricklefs, H. F. Greeney, D. L. Wagner, H. C. Morais, I. R. Diniz, T. A. Kursar, and P. D. Coley. 2007.** Host specificity of Lepidoptera in tropical and temperate forests. *Nature* 448: 696-699.
- Ebbels, D. L. 2003.** Principles of plant health and quarantine. CABI Publishing, Wallingford, UK.
- Edwards, W. H. 1873.** Some remarks on entomological nomenclature. *Can. Entomol.* 5: 21-36.
- Erwin, T. L. 1982.** Tropical forests: their richness in Coleoptera and other arthropod species. *Coleopt. Bull.* 36: 74-75.
- Erwin, T. L. 1988.** Tropical forest canopies: the heart of biotic diversity, pp. 123-129. In Wilson, E. O. and F. M. Peter [Eds.]. *Biodiversity*. National Academy Press, Washington, DC.
- Erwin, T. L. 1991.** How many species are there? Revisited. *Conserv. Biol.* 5: 330-333.
- Erwin, T. L. 2004.** The biodiversity question: how many species of terrestrial arthropods are there? pp. 259-269. In Lowman, M. D. and H. B. Rinker [Eds.]. *Forest canopies*, 2nd ed. Elsevier Academic Press, Amsterdam.
- Essig, E. O. 1931.** A history of entomology. Macmillan, New York.
- Evans, H. E. 1968.** Life on a little-known planet. E. P. Dutton, New York.
- Evenhuis, N. L. 2008.** The "mihitch"—a brief history. *Zootaxa* 1890: 59-68.
- Fletcher, J. ("J. F."). 1895.** Charles Valentine Riley. *Can. Entomol.* 27: 273-274.
- Gaston, K. J. 1991.** The magnitude of global insect species richness. *Conserv. Biol.* 5: 283-296.
- Gaston, K. J. and L. A. Mound. 1993.** Taxonomy, hypothesis testing and the biodiversity crisis. *Proc. R. Soc. Lond. B* 251: 139-142.
- Gaston, K. J., M. J. Scoble, and A. Crook. 1995.** Patterns in species description: a case study using the Geometridae (Lepidoptera). *Biol. J. Linn. Soc.* 55: 225-237.
- Gerson, U., R. L. Smiley, and R. Ochoa. 2003.** Mites (Acari) for pest control. Blackwell Science, Oxford, UK.
- Gill, T. 1897.** Some questions of nomenclature. *Proc. Am. Assoc. Adv. Sci.* 44th Meet., Buffalo, N.Y., August, 1886. AAAS, Salem, MA.
- Goode, G. B. 1889.** Report of the Assistant Secretary in charge of the National Museum. Review of the year's work in the scientific departments: Department of Insects, pp. 18-19. In Annual Report of the Board of Regents of the Smithsonian Institution, showing the operations, expenditures, and condition of the institution for the year ending June 30, 1886. Government Printing Office, Washington, DC.
- Goode, G. B. 1896.** A memorial appreciation of Charles Valentine Riley. *Science* 3: 217-225.
- Gossard, H. A. 1909.** Relation of insects to human welfare. *J. Econ. Entomol.* 2: 313-324.
- Granett, J., M. A. Walker, L. Kocsis, and A. D. Omer. 2001.** Biology and management of grape phylloxera. *Annu. Rev. Entomol.* 46: 387-412.
- Gurney, A. B. 1976.** A short history of the Entomological Society of Washington. *Proc. Entomol. Soc. Wash.* 78: 225-239.
- Hatch, M. H. 1926.** Thomas Lincoln Casey as a coleopterist. *Entomol. News* 37: 175-179, 198-202.
- Henshaw, S. 1889-1890.** Bibliography of the more important contributions to American economic entomology. Part II. The more important joint writings of B. D. Walsh and C. V. Riley, pp. 51-95; Part III. The more important writings of Charles Valentine Riley, pp. 97-371 (1889); Indices to parts I, II, and III. Systematic index of the new names proposed by B. D. Walsh and Walsh and Riley, pp. 373-376; Systematic index of the new names proposed by C. V. Riley, pp. 377-379 (1890). Government Printing Office, Washington, DC.
- Hodges, R. W. 1976.** Presidential address 1976—what insects can we identify? *J. Lepid. Soc.* 30: 245-251.
- Hodkinson, I. D. 1988.** The Nearctic Psylloidea (Insecta: Homoptera): an annotated checklist. *J. Nat. Hist.* 22: 1179-1243.
- Howard, L. O. 1882.** Alternate generation in Cynipidae. *Psyche* 3: 328-329.
- Howard, L. O. 1894.** A brief account of the rise and present condition of official economic entomology. *Insect Life* 7: 55-107.
- Howard, L. O. 1895.** A review of the work of the Entomological Society of Washington during the first ten years of its existence. *Proc. Entomol. Soc. Wash.* 3: 161-167.
- Howard, L. O. 1909.** The Entomological Society of Washington. *Proc. Entomol. Soc. Wash.* 11: 8-18.
- Howard, L. O. 1930.** A history of applied entomology (somewhat anecdotal). *Smithsonian Misc. Collect.* Vol. 84. Smithsonian Institution, Washington, DC.
- Howard, L. O. 1931.** The insect menace. Century, New York.
- Howard, L. O. 1933.** Fighting the insects; the story of an entomologist, telling the life and experiences of the writer. Macmillan, New York.
- ICZN (International Commission on Zoological Nomenclature). 1999.** International Code of Zoological Nomenclature, 4th ed. International Trust for Zoological Nomenclature, c/o Natural History Museum, London.
- Kellogg, R. 1946.** A century of progress in Smithsonian biology. *Science* 104: 132-141.
- Kenyon, F. C. 1897.** The number of living animal species. *Am. Nat.* 31: 66-79.
- Kirby, W. and W. Spence. 1815.** An introduction to entomology or elements of the natural history of insects. Longman, Hurst, Rees, Orme, and Brown, London.
- Knutson, L. 1991.** A tribute to Charles Valentine Riley: American entomologist, pp. 97-104. In Menn, J. J. and A. L. Steinhauer [Eds.]. *Progress and perspectives for the 21st century*. Entomological Society of America, Lanham, MD.
- Kritsky, G. 1981.** Charles Darwin's contribution to entomology and an index to his insect references. *Melsheimer Entomol. Ser.* 30: 1-14.
- Kritsky, G. 1995.** Darwin, Walsh, and Riley: the entomological link. *Am. Entomol.* 41: 89-95.
- Leng, C. W. 1925.** Thomas Lincoln Casey. *Entomol. News* 36: 97-100.
- Lintner, J. A. 1890.** Sixth Report of the injurious and other insects of the State of New York. James B. Lyon, Albany.
- Lockwood, J. A. 2004.** Locust: the devastating rise and mysterious disappearance of the insect that shaped the American frontier. Basic Books, New York.
- McLachlan, R. 1895.** Prof. Charles Valentine Riley, M.A., Ph.D., Hon. F.E.S., & Entomol. Mon. Mag. 31: 269-270.
- McWilliams, J. E. 2008.** American pests: the losing war on insects from colonial times to DDT.

- Columbia University Press, New York.
- Mallis, A. 1971.** American entomologists. Rutgers University Press, New Brunswick, NJ.
- Mallis, A. 1980.** "Prof. C. V. Riley" in the *Mobile Register*. Melsheimer Entomol. Ser. 28: 19-20.
- Marcus, A. I. 1985.** Agricultural science and the quest for legitimacy: farmers, agricultural colleges, and experiment stations, 1870-1890. Iowa State University Press, Ames.
- May, R. M. 1986.** How many species are there? *Nature* 324: 514-515.
- May, R. M. 2002.** The future of biological diversity in a crowded world. *Curr. Sci.* 82: 1325-1331.
- Mayr, E., E. G. Linsley, and R. L. Usinger. 1953.** Methods and principles of systematic zoology. McGraw-Hill, New York.
- Meiners, E. P. 1943.** Charles Valentine Riley, C. V. Riley Entomol. Soc., Univ. of Missouri, Columbia (mimeo). (rptd. Melsheimer Entomol. Ser. 22: 19-30, 1977).
- Metcalf, Z. P. 1940.** How many insects are there in the world? *Entomol. News* 51: 219-222.
- Michener, C. D. 1953.** Life-history studies in insect systematics. *Syst. Zool.* 2: 112-118.
- Miller, G. L. and R. G. Foottit. 2009.** The taxonomy of crop pests: the aphids, pp. 463-473. In Foottit, R. G. and P. H. Adler [Eds.]. *Insect biodiversity: science and society*. Wiley-Blackwell, Chichester, UK.
- Mitter, C. 1999.** Sketches of U. S. systematic entomology, circa 1850-2000: return of a golden age? *Ann. Entomol. Soc. Am.* 92: 798-811.
- Mound, L. A. and K. J. Gaston. 1993.** Conservation and systematics—the agony and the ecstasy, pp. 185-195. In Gaston, K. J., T. R. New, and M. J. Samways [Eds.]. *Perspectives on insect conservation*. Intercept, Andover, UK.
- Nielsen, E. S. and L. A. Mound. 1999.** Global diversity of insects: the problems of estimating numbers, pp. 213-222. In Raven, P. H. and T. Williams [Eds.]. *Nature and human society: the quest for a sustainable world*. National Academy Press, Washington, DC.
- Ødegaard, F. 2000.** How many species of arthropods? Erwin's estimate revised. *Biol. J. Linn. Soc.* 71: 583-597.
- Ordish, G. 1972.** The great wine blight. Scribner, New York.
- Osborn, H. 1937.** Fragments of entomological history, including some personal recollections of men and events. The author, Columbus, OH.
- Packard, A. S. 1895.** Charles Valentine Riley. *Science* 2: 745-751.
- Papavero, N. and S. Ibáñez-Bernal. 2001.** Contributions to a history of Mexican dipterology. Part 1. Entomologists and their works before the *Biologia Centrali-Americana*. *Acta Zool. Mex.* 84: 65-173.
- Pellmyr, O. 1999.** Systematic revision of the yucca moths in the *Tegeticula yuccasella* complex (Lepidoptera: Prodoxidae) north of Mexico. *Syst. Entomol.* 24: 243-271.
- Pellmyr, O. 2003.** Yuccas, yucca moths, and coevolution: a review. *Ann. Missouri Bot. Gard.* 90: 35-55.
- Pellmyr, O. and M. Balcázar-Lara. 2000.** Systematics of the yucca moth genus *Parategeticula* (Lepidoptera: Prodoxidae), with description of three Mexican species. *Ann. Entomol. Soc. Am.* 93: 432-439.
- Pellmyr, O., M. Balcázar-Lara, D. M. Althoff, K. A. Segraves, and J. Leebens-Mack. 2006.** Phylogeny and life history evolution of *Prodoxus yucca* moths (Lepidoptera: Prodoxidae). *Syst. Entomol.* 31: 1-20.
- Pellmyr, O., M. Balcázar-Lara, K. A. Segraves, D. M. Althoff, and R. J. Littlefield. 2008.** Phylogeny of the pollinating yucca moths, with revision of Mexican species (*Tegeticula* and *Parategeticula*; Lepidoptera, Prodoxidae). *Zool. J. Linn. Soc.* 152: 297-314.
- Pollock, D. A. 1996.** [Review of] Poole, R. W. and P. Gentili (editors). *Nomina Insecta Nearctica. A Check List of the Insects of North America. Volume 1: Coleoptera, Strepsiptera*. Entomological Information Services, Rockwell, MD. *Coleopt. Bull.* 50: 371-372.
- Poole, R. W. and P. Gentili [Eds.]. 1996-1997.** *Nomina Insecta Nearctica: A Check List of the Insects of North America. Vol. 1: Coleoptera, Strepsiptera; Vol. 2: Hymenoptera, Mecoptera, Megaloptera, Neuroptera, Raphidioptera, Trichoptera; Vol. 3: Diptera, Lepidoptera, Siphonaptera; Vol. 4: Non-Holometabolous orders*. Entomological Information Services, Rockville, MD.
- Powell, J. A. 1992.** Interrelationships of yuccas and yucca moths. *Trends Ecol. Evol.* 7: 10-15.
- Raczkowski, J. M. and J. W. Wenzel. 2007.** Biodiversity studies and their foundation in taxonomic scholarship. *BioScience* 57: 974-979.
- Radcliffe, E. B. 1982.** Insect pests of potato. *Annu. Rev. Entomol.* 27: 173-204.
- Ray, J. 1691.** The wisdom of God manifested in the works of the creation: being the substance of some common places delivered in the chappel of Trinity College in Cambridge. Printed for Samuel Smith at the Princes Arms in S. Pauls Church-yard, London.
- Riley, C. V. 1869.** First annual report on the noxious, beneficial and other insects, of the State of Missouri. Elwood Kirkwood, Jefferson, City.
- Riley, C. V. 1871a.** Third annual report of the noxious, beneficial and other insects, of the State of Missouri. Horace Wilcox, Jefferson City.
- Riley, C. V. 1871b.** Friendly notes. *Can. Entomol.* 3: 117-119.
- Riley, C. V. 1872.** Fourth annual report on the noxious, beneficial and other insects, of the State of Missouri. Regan & Edwards, Jefferson City.
- Riley, C. V. 1873a.** Fifth annual report on the noxious, beneficial, and other insects of the State of Missouri. Regan & Carter, Jefferson City.
- Riley, C. V. 1873b.** Controlling sex in butterflies. *Am. Nat.* 7: 513-521.
- Riley, C. V. 1874.** Sixth annual report on the noxious, beneficial, and other insects, of the State of Missouri. Regan & Carter, Jefferson City.
- Riley, C. V. 1876.** Potato pests. Being an illustrated account of the Colorado potato-beetle and other insect foes of the potato in North America. With suggestions for their repression and methods for their destruction. Orange Judd, New York.
- Riley, C. V. 1880a.** Synonyms of parasites: mistakes corrected. *Am. Entomol.* 3 (N. S. 1): 293.
- Riley, C. V. 1880b.** The true and the bogus yucca moth; with remarks on the pollination of yucca. *Am. Entomol.* 1: 141-145.
- Riley, C. V. 1882a.** Darwin's works in entomology. *Proc. Biol. Soc. Wash.* 1: 70-80.
- Riley, C. V. 1882b.** Entomology: Horn's classification of the Carabidae. *Am. Nat.* 16: 63-64.
- Riley, C. V. 1883a.** Entomology. The old, old question of species. *Am. Nat.* 17: 975.
- Riley, C. V. 1883b.** Hackberry psyllid galls. *Can. Entomol.* 15: 157-159.
- Riley, C. V. 1884.** Recent advances in economic entomology. *Bull. Philos. Soc. Wash.* 10: 10-12.
- Riley, C. V. 1885a.** Note 2 [following Appendices], pp. 95-96. In Fourth Report of the United States Entomological Commission, Being a Revised edition of Bulletin No. 3, and the Final Report on the Cotton Worm, Together with a Chapter on the Boll Worm. Government Printing Office, Washington, DC.
- Riley, C. V. 1885b.** Notes on North American Psyllidae. *Proc. Biol. Soc. Wash.* 2: 67-79.
- Riley, C. V. 1885c.** The collection of insects in the national museum. *Science* 5: 188-189.
- Riley, C. V. 1885d.** The periodical cicada. (*Cicada septemdecim*, L.; and race *tredecim*, Riley.). Suborder Homoptera; Family Cicadidae, pp. 233-258. In Report of the Commissioner of Agriculture, 1885. Government Printing Office, Washington, DC.
- Riley, C. V. 1886.** Annual address of the president. *Proc. Entomol. Soc. Wash.* 1: 17-27.
- Riley, C. V. 1888.** An enumeration of the published synopses, catalogues, and lists of North American insects; together with other information intended to assist the student of American entomology. U. S. Dep. Agric. Div. Entomol. Bull. 19. Government Printing Office, Washington, DC.
- Riley, C. V. 1889.** The hop plant-louse. (*Phorodon humuli* Schrank.). Order Homoptera; family Aphididae, pp. 93-111. In Report of the Commissioner of Agriculture, 1888. Government Printing Office, Washington, DC.
- Riley, C. V. 1890.** The insect collection of a large museum. *Insect Life* 2: 342-346.
- Riley, C. V. 1891.** The outlook for applied entomology. *Insect Life* 3: 181-210.
- Riley, C. V. 1892a.** Directions for collecting and preserving insects. *Bull. U. S. Natl. Mus.* 39 (Pt. F). Government Printing Office, Washington, DC.
- Riley, C. V. 1892b.** The yucca moth and yucca pollination, pp. 99-158. In Third Ann. Rep. Missouri Bot. Gard.
- Riley, C. V. 1892c.** New species of Prodoxidae. *Proc. Entomol. Soc. Wash.* 2: 312-319.
- Riley, C. V. 1893a.** Parasitic and predaceous insects in applied entomology. *Insect Life* 6: 130-141.
- Riley, C. V. 1893b.** Parasitism in insects. *Proc. Entomol. Soc. Wash.* 2: 397-431.
- Riley, C. V. 1894.** Social insects from psychical and evolutionary points of view. *Proc. Biol. Soc. Wash.* 9: 1-74.
- Riley, C. V. and L. O. Howard. 1890.** Some new iceryas. *Insect Life* 3: 92-106.
- Rosen, D. 1986.** The role of taxonomy in effective biological control programs. *Agric. Ecosyst. Environ.* 15: 121-129.
- Russell, L. M. 1980.** Theodor Pergande—investigator of the Aphidoidea. *Melsheimer Entomol. Ser.* 28: 16-18.
- Sabrosky, C. W. 1952.** How many insects are there?, pp. 1-7. In *Insects: the yearbook of agriculture*. U. S. Government Printing Of-



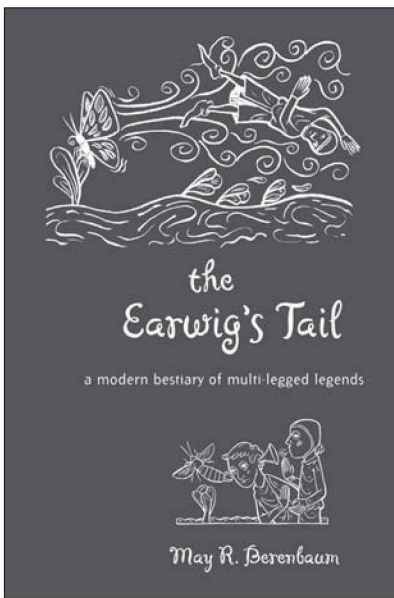

## THE EARWIG'S TAIL

A Modern Bestiary of  
Multi-legged Legends

MAY R. BERENBAUM

"Throughout *The Earwig's Tail*, Berenbaum squashes urban myths about bugs, explaining along the way why you should not wear your dog's flea and tick collar even if you have fleas, as she once did. For 20 years she has taught an entomology course called 'Insects and people,' and this book provides a wry look at their interactions. It is scientifically accurate, studded with Latin names and journal references, and consistently funny."

—Jonathan Beard, *New Scientist*

"[Berenbaum's] chatty and highly readable new book, *The Earwig's Tail: A Modern Bestiary of Multi-legged Legends*, unites her scholarship with her interest in the fantasies insects inspire in humans."

—Robert Fulford, *National Post*

new in cloth / \$23.95

Read an excerpt on our web site

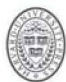

HARVARD UNIVERSITY PRESS

WWW.HUPHARVARD.EDU  
BLOG: HARVARDPRESS.TYPEPAD.COM  
TEL: 800.405.1619

face, Washington, DC. (rptd. Syst. Zool. 2: 31-36, 1953).

**Sabrosky, C. W. 1964.** Taxonomic entomology in the U. S. Department of Agriculture. Bull. Entomol. Soc. Am. 10: 211-220.

**Samways, M. J. 2009.** Reconciling ethical and scientific issues for insect conservation. pp. 547-559. In Footitt, R. G. and P. H. Adler [Eds.]. Insect biodiversity: science and society. Wiley-Blackwell, Chichester, UK.

**Saunders, W. 1876.** Annual address of the president of the Entomological Society of Ontario. Can. Entomol. 8: 210-217.

**Scudder, S. H. 1872.** A systematic revision of some of the North American butterflies, with brief notes of those known to occur in Essex Co., Mass., pp. 24-92. In Rep. Peabody Acad. Sci. Salem, Mass. 4th Ann. Rep. 1871.

**Scudder, S. H. 1878.** Recent progress of entomology in North America. Psyche 2: 97-116.

**Sheppard, C. A. 2004.** Benjamin Dann Walsh: pioneer entomologist and proponent of Darwinian theory. Annu. Rev. Entomol. 49: 1-25.

**Sheppard, C. A. and R. A. Oliver. 2004.** Yucca moths and yucca plants: discovery of "the most wonderful case of fertilisation." Am. Entomol. 50: 32-46.

**Sheppard, C. A. and R. A. Weinzierl. 2002.** Entomological lucubrations: the 19th century spirited conflict concerning the natural history of the armyworm, *Pseudaletia unipuncta* (Haworth) (Lepidoptera: Noctuidae). Am. Entomol. 48: 108-117.

**Smith, C. M. 2005.** Plant resistance to arthropods: molecular and conventional approaches. Springer, Dordrecht.

**Smith, E. H. 1989.** The Entomological Society of America: the first hundred years, 1889-1989. Bull. Entomol. Soc. Am. 35: 10-32.

**Smith, E. H. 1992.** The grape phylloxera—a celebration of its own. Am. Entomol. 38: 212-221.

**Smith, E. H. and J. R. Smith. 1996.** Charles Valentine Riley: the making of the man and his achievements. Am. Entomol. 42: 228-238.

**Smith, S. M. 1996.** Biological control with *Trichogramma*: advances, successes, and potential of their use. Annu. Rev. Entomol. 41: 375-406.

**Solow, A. R., L. A. Mound, and K. J. Gaston. 1995.** Estimating the rate of synonymy. Syst. Biol. 44: 93-96.

**Sorensen, W. C. 1995.** Brethren of the net: American entomology, 1840-1880. University of Alabama Press, Tuscaloosa.

**Sorensen, W. C., E. H. Smith, J. Smith, and Y. Carton. 2008.** Charles V. Riley, France, and *Phylloxera*. Am. Entomol. 54: 134-149.

**Spilman, T. J. 1984.** Vignettes of 100 years of the Entomological Society of Washington. Proc. Entomol. Soc. Wash. 86: 1-10.

**Stork, N. E. 1993.** How many species are there? Biodiversity Conserv. 2: 215-232.

**Stork, N. E. and P. S. Grimbacher. 2006.** Beetle assemblages from an Australian tropical rainforest show that the canopy and the ground strata contribute equally to biodiversity. Proc. R. Soc. B Biol. Sci. 273: 1969-1975.

**Uhler, P. R. 1873.** Meeting of the American Association for 1873. Can. Entomol. 5: 165-166.

**Usinger, R. L. 1956.** The stability of scientific

names. Annu. Rev. Entomol. 1: 59-70.

**Walsh, B. D. and C. V. Riley. 1868.** The old and new philosophy. Am. Entomol. 1: 17.

**Walsh, B. D. and C. V. Riley. 1869.** Scientific nomenclature. Am. Entomol. 2: 5-8.

**Wapshere, A. J. and K. F. Helm. 1987.** Phylloxera and *Vitis*: an experimentally testable coevolutionary hypothesis. Am. J. Enol. Vitic. 38: 216-222.

**Weber, D. C. 2006.** [Review of] *The Botanist and the Vintner: How Wine was Saved for the World*. Am. Entomol. 52: 200-201.

**Weber, D. C. and D. N. Ferro. 1994.** Colorado potato beetle: diverse life history poses challenge to management, pp. 54-70. In Zehnder, G. W., M. L. Powelson, R. K. Jansson, and K. V. Raman [Eds.]. APS Press, St. Paul, MN.

**Westwood, J. O. 1833.** On the probable number of species of insects in the creation; together with descriptions of several minute Hymenoptera. Mag. Nat. Hist. J. Zool. Bot. Mineral. Geol. Meteorol. 6: 116-123.

**Wilkinson, R. S. 1969.** Townsend Glover (1813-83) and first entomological light trap. Michigan Entomol. 2: 55-62.

**Williams, R. N. and G. F. Shambaugh. 1988.** Grape phylloxera (Homoptera: Phylloxeridae) biotypes confirmed by electrophoresis and host susceptibility. Ann. Entomol. Soc. Am. 81: 1-5.

**Wilson, M. R. and J. A. Turner. 2007.** Progress in the study of sharpshooter leafhoppers (Hemiptera: Auchenorrhyncha: Cicadellidae) over 150 years: monographs, museums and individuals. Tijdschr. Entomol. 150: 289-303.

**Yang, M.-M. and C. Mitter. 1994.** Biosystematics of hackberry psyllids (*Pachypsylla*) and the evolution of gall and lerp formation in psyllids (Homoptera: Psylloidea): a preliminary report, pp. 172-185. In Price, P. W., W. J. Mattson, and Y. N. Baranchikov [Eds.]. The ecology and evolution of gall-forming insects. U. S. Dep. Agric. For. Serv. (No. Cent. For. Exp. Stn.) Gen. Tech. Rep. NC-174, St. Paul, MN.

**Yang, M.-M., C. Mitter, and D. R. Miller. 2001.** First incidence of inquiline in gall-forming psyllids, with a description of the new inquiline species (Insecta, Hemiptera Psylloidea, Psyllidae, Spondyliaspidae). Zool. Scr. 30: 97-113.

**Alfred G. Wheeler** (awhlr@clemson.edu), adjunct professor of entomology at Clemson University, works mainly with the bionomics of the Miridae and other plant-associated Hemiptera. His professional interests also include the study of insects that are adventive in North America and the history of entomology.

**E. Richard Hoebeke** (erh2@cornell.edu) is a senior extension associate in the Department of Entomology, Cornell University, Ithaca, NY, and collection manager/assistant curator of the Cornell University Insect Collection. His research focuses on the detection of and survey for exotic insects in North America. **Edward H. Smith** (jananded@aol.com), professor of Entomology, Emeritus, Cornell University, currently resides in Asheville, NC. Long interested in entomological history, he continues his work on a comprehensive biography of C. V. Riley.
